# Supplementary material for: Exploratory analysis of HLA variants and occult HBV infection: a multicenter case-control study in Chinese blood donors
Source: Research Square preprint supplement (doi:10.21203/rs.3.rs-7323223/v1), 2025-09-01
Supplement: Supplementary file 1 [file Table S1-S3.xlsx]

## Sheet: Table S1
Table S1. Baseline and sequencing information of OBI and chronic HBsAg+ participants included in this study
Participant ID	Gender	Age	ALT(U/L)	HBV infection State	Vaccinated	HBsAg	HBV DNA	anti-HBs (mIU/mL)	anti-HBs	anti-HBc	HBeAg	anti-HBe	Raw data (G)	Q30(%)	GC(%)	Duplication ratio(%)	Average_sequencing_depth_on_target	Fraction_of_target_covered_with_at_least_20x(%)
p001	Female	50	11	OBI	-	-	+	8.74	-	+	-	-	17.0124	96.31	50.18	0.1903	158.92	0.9392
p002	Male	50	21.5	OBI	-	-	+	47.09	+	+	-	+	11.5069	97.19	50.52	0.1586	106.52	0.9069
p003	Male	25	15.6	HBsAg+	Y	+	+	0.94	-	+	-	+	15.3399	96.78	49.8	0.2278	140.87	0.9363
p004	Female	36	14.5	OBI	-	-	+	0.79	-	+	-	+	20.9221	95.65	51.44	0.3091	199.95	0.9422
p005	Male	49	14.475	OBI	Y	-	+	285.69	+	+	-	-	11.0222	97.15	50.8	0.1812	105.32	0.9051
p006	Male	41	19	HBsAg+	-	+	+	0	-	+	-	+	13.9285	96.75	49.04	0.2214	125.36	0.9303
p007	Female	35	26.2	HBsAg+	-	+	+	0.39	-	+	-	+	13.8582	96.61	49.21	0.2234	127.54	0.9297
p008	Male	25	15.2	HBsAg+	-	+	+	0	-	+	-	+	10.6353	93.62	50.24	0.1901	96.24	0.9088
p009	Male	45	48.3	OBI	-	-	+	1.39	-	+	-	+	11.0309	96.73	49.49	0.2196	101.75	0.9191
p010	Female	33	12.1	OBI	-	-	+	3.18	-	+	-	-	14.4204	97.14	52.41	0.1974	136.16	0.9153
p011	Male	48	30	HBsAg+	-	+	+	0	-	+	-	+	12.6011	97.55	48.5	0.2263	119.81	0.9312
p012	Female	21	12	HBsAg+	Y	+	+	0	-	+	-	+	18.3717	96.3	49.24	0.2412	178.04	0.9463
p013	Female	50	18.1	HBsAg+	-	+	+	4.79	-	+	-	+	11.9711	96.65	48.66	0.1289	104.43	0.9126
p014	Male	48	6.454	OBI	-	-	+	4.17	-	+	-	+	19.8063	95.57	51.21	0.3124	188.96	0.9418
p015	Male	51	49	HBsAg+	-	+	+	2.66	-	+	-	+	13.6051	96.02	48.64	0.2938	126.88	0.9328
p016	Male	42	10.7	HBsAg+	-	+	+	0.47	-	+	-	+	13.8172	96.62	48.78	0.2195	125.46	0.9286
p017	Male	40	25.3	HBsAg+	-	+	+	1.44	-	+	-	+	15.5717	97.09	49.14	0.2309	141.49	0.9381
p018	Male	51	31.562	HBsAg+	-	+	+	8.85	-	+	-	+	12.8904	96.45	51.48	0.2364	121.42	0.9127
p019	Male	51	20.656	OBI	-	-	+	13.88	+	+	-	+	11.2575	96.64	49.39	0.2051	102.71	0.9186
p020	Male	26	23.1	HBsAg+	-	+	+	3.22	-	+	-	+	11.537	96.24	49.3	0.2124	104.76	0.9168
p021	Male	54	10	OBI	-	-	+	7.99	-	+	-	-	18.4681	96.21	49.79	0.2003	170.35	0.945
p022	Female	27	6	OBI	Y	-	+	47.56	+	+	+	-	15.6387	95.69	50.67	0.1711	144.79	0.9339
p023	Male	54	22.6	OBI	-	-	+	4.8	-	+	-	+	17.3061	96.34	50.34	0.2142	165.83	0.9433
p024	Male	31	22	OBI	-	-	+	2.29	-	+	-	-	20.2096	96.32	50.61	0.2133	189.35	0.9471
p025	Male	29	49	HBsAg+	-	+	+	0.46	-	+	-	+	13.1171	96.21	49.31	0.234	123.8	0.9333
p026	Male	37	49	OBI	-	-	+	44.52	+	+	-	-	11.082	96.12	50	0.2441	101.77	0.9157
p027	Male	33	17	HBsAg+	Y	+	+	2.42	-	+	+	-	21.4461	95.54	51.24	0.3338	203.13	0.944
p028	Female	23	5.4	OBI	-	-	+	113.94	+	+	-	+	18.8415	96.34	50.6	0.2094	178.3	0.9446
p029	Male	35	18	HBsAg+	Y	+	+	7.55	-	+	-	+	12.3746	97.04	50.78	0.17	118.24	0.9148
p030	Male	54	49	OBI	-	-	+	14.7	+	+	-	+	10.4959	96.28	49.29	0.2505	93.28	0.9073
p031	Female	51	16	OBI	-	-	+	9.97	-	+	-	+	12.4904	97.23	51.7	0.1807	121.66	0.913
p032	Male	47	28.3	HBsAg+	-	+	+	0.58	-	+	-	+	10.8053	96.73	48.92	0.1301	94.3	0.906
p033	Male	47	49	OBI	-	-	+	53.22	+	+	-	+	9.32409	95.95	49.99	0.1902	80.09	0.8905
p034	Female	44	8.727	HBsAg+	Y	+	+	0.29	-	+	-	+	17.6314	96.21	49.97	0.2356	164.92	0.942
p035	Male	40	12	HBsAg+	-	+	+	0	-	+	-	+	11.3959	97.19	50.78	0.1678	107.96	0.9077
p036	Male	33	12.35	HBsAg+	-	+	+	1.15	-	+	-	+	22.4766	95.42	51.57	0.3401	218.16	0.9467
p037	Male	43	39.911	OBI	-	-	+	3.45	-	+	-	+	11.1596	97.22	50.51	0.172	105.19	0.9058
p038	Male	50	22.3	OBI	-	-	+	2.92	-	+	-	+	11.8624	97.65	49.13	0.3247	112.23	0.9257
p039	Male	54	10.3	OBI	-	-	+	0.16	-	+	-	-	17.8219	96.09	49.82	0.1728	161.75	0.9436
p040	Female	38	10.9	OBI	-	-	+	17.65	+	-	-	-	15.4244	95.73	50.48	0.1721	144.46	0.9346
p041	Male	53	30.3	OBI	-	-	+	0.71	-	+	-	+	17.324	95.7	51.01	0.1861	163.05	0.9403
p042	Male	23	8.7	HBsAg+	-	+	+	0.53	-	+	-	+	11.0356	97.18	50.4	0.1689	105.25	0.9071
p043	Male	48	25.2	OBI	-	-	+	14.42	+	+	-	+	11.1235	97.11	50.75	0.1849	107.36	0.908
p044	Male	34	15.6	HBsAg+	-	+	+	12.38	+	+	-	+	13.263	96.21	51.82	0.2643	128.77	0.9151
p045	Male	42	20.3	HBsAg+	-	+	+	2.54	-	+	-	-	10.0604	95.79	49.61	0.1431	90.26	0.9047
p046	Male	50	14.3	OBI	-	-	+	1.72	-	+	-	-	13.7888	97.65	49.94	0.2628	128.57	0.934
p047	Male	46	38.9	HBsAg+	-	+	+	0.73	-	+	-	+	11.7241	96.09	48.33	0.2659	105.65	0.9193
p048	Male	58	26	OBI	-	-	+	34.63	+	+	-	+	10.9506	97.18	51.29	0.1826	106.01	0.9036
p049	Male	53	11.4	HBsAg+	-	+	+	0	-	+	-	+	15.6462	93.52	50.5	0.238	144.75	0.9333
p050	Male	49	19.4	OBI	-	-	+	10.52	+	+	-	-	15.2485	93.53	50.58	0.2444	138.66	0.9307
p051	Male	49	16.1	OBI	-	-	+	5.68	-	+	-	-	20.1087	96.32	50.2	0.2082	192.07	0.9485
p052	Male	48	6	OBI	-	-	+	9.47	-	+	-	+	14.7126	92.7	51.03	0.1852	132.81	0.9226
p053	Male	41	18.2	OBI	Y	-	+	0.23	-	+	-	-	14.3227	95.84	50.06	0.1919	136.13	0.9329
p054	Female	38	17.4	HBsAg+	-	+	+	33.66	+	+	-	+	9.56857	95.66	49.76	0.1381	84.86	0.8956
p055	Male	47	15.851	OBI	Y	-	+	333.27	+	+	-	-	12.6509	96.58	48.59	0.1397	112.94	0.921
p056	Male	51	29.263	OBI	-	-	+	1.81	-	+	-	-	20.409	96.56	48.84	0.2379	183.43	0.9481
p057	Female	42	11	HBsAg+	-	+	+	1.06	-	+	-	+	13.5863	96.28	51.37	0.2495	131.84	0.9191
p058	Male	38	21	HBsAg+	-	+	+	0	-	+	+	-	13.1582	97.29	51.4	0.1787	127.13	0.9178
p059	Male	33	34.6	HBsAg+	-	+	+	0.71	-	+	-	-	11.2156	96.34	49.22	0.2001	101.57	0.9118
p060	Male	56	17	OBI	Y	-	+	13.06	+	+	-	+	11.5811	97.23	50.9	0.1678	110.25	0.9088
p061	Male	29	17.7	HBsAg+	-	+	+	0.68	-	-	-	-	19.0476	96.5	49.98	0.2255	173.56	0.9431
p062	Male	34	31.4	HBsAg+	-	+	+	1.47	-	+	+	-	15.4837	96.45	49.4	0.2094	141.31	0.9381
p063	Female	43	13.7	HBsAg+	-	+	+	0.53	-	+	-	+	21.1446	96.51	49.76	0.2395	192.67	0.9459
p064	Male	47	36.9	OBI	-	-	+	14.89	+	+	-	+	15.6868	97.12	48.74	0.1941	142.81	0.9368
p065	Male	33	19	HBsAg+	-	+	+	0.09	-	+	-	+	17.9833	96.39	49.83	0.2381	166.25	0.9438
p066	Male	35	46.017	OBI	-	-	+	74.7	+	+	-	+	14.131	96.62	48.86	0.1353	128.17	0.9303
p067	Male	49	18.1	HBsAg+	-	+	+	0.45	-	+	-	+	14.5244	96.16	50.21	0.1768	130.21	0.932
p068	Male	50	12.4	HBsAg+	-	+	+	0.57	-	+	-	+	10.1719	95.68	49.85	0.1375	89.47	0.9023
p069	Male	38	32.3	HBsAg+	-	+	+	0.36	-	+	-	+	10.1421	94.39	50.16	0.2101	95.86	0.9098
p070	Male	31	33.9	OBI	Y	-	+	28.22	+	+	-	+	19.6917	96.39	50.51	0.2202	180.79	0.9449
p071	Female	47	12.9	OBI	Y	-	+	11.3	+	+	-	+	13.6163	96.71	48.39	0.2702	128.05	0.9309
p072	Male	51	34.7	HBsAg+	-	+	+	0.05	-	+	-	+	14.2233	92.44	51.18	0.1834	136.27	0.9255
p073	Male	28	30.23	HBsAg+	Y	+	+	1.78	-	+	-	+	17.2421	96.6	49.79	0.2274	161.26	0.9402
p074	Female	22	40.4	HBsAg+	-	+	+	0.94	-	+	-	+	14.9669	96.54	49.33	0.2344	137.93	0.9339
p075	Male	33	13	OBI	-	-	+	8.18	-	+	-	-	9.75279	97.27	48.55	0.2364	92.2	0.9099
p076	Male	47	18	HBsAg+	-	+	+	0	-	+	-	+	20.9092	96.62	49.76	0.2139	191.8	0.9491
p077	Female	21	14.4	HBsAg+	-	+	+	3.3	-	+	-	+	14.3385	96.48	49.36	0.2108	131.27	0.9327
p078	Male	52	20.1	OBI	-	-	+	30.97	+	+	-	-	13.707	96.03	50.5	0.2176	127.68	0.9266
p079	Male	43	36.585	OBI	Y	-	+	26.13	+	+	-	-	10.7811	97.27	48.8	0.2294	101.82	0.9229
p080	Female	21	3.4	HBsAg+	-	+	+	1.82	-	+	-	+	13.624	96.16	49.97	0.1786	122.73	0.9296
p081	Male	43	44.3	HBsAg+	-	+	+	0.42	-	+	-	+	10.952	97.96	49.36	0.3015	104.1	0.9195
p082	Female	53	21.7	OBI	-	-	+	0.47	-	+	-	+	13.4081	97.2	49.21	0.231	122.15	0.9278
p083	Male	31	23.089	HBsAg+	-	+	+	0.78	-	+	-	+	15.4425	96.57	49.83	0.2229	138.64	0.9345
p084	Male	40	24.9	OBI	-	-	+	12.86	+	+	-	-	22.4141	96.82	48.7	0.2364	196.35	0.9512
p085	Male	18	16.3	HBsAg+	-	+	+	0	-	+	-	+	16.2305	96.56	49.91	0.2125	143.41	0.9355
p086	Male	49	17.4	OBI	-	-	+	1.24	-	+	-	+	12.6847	96.62	48.21	0.2018	118.81	0.9279
p087	Male	43	19.9	HBsAg+	-	+	+	0.64	-	+	-	+	11.7658	97.71	48.98	0.1991	107.56	0.9237
p088	Male	30	24.3	HBsAg+	-	+	+	0.3	-	+	-	+	17.2986	96.48	50.65	0.2156	162.15	0.9396
p089	Female	42	36	HBsAg+	-	+	+	0	-	+	-	+	15.7308	96.37	51.55	0.2599	152.22	0.9276
p090	Female	52	41	OBI	-	-	+	1.39	-	+	-	-	13.9548	96.61	49.25	0.2266	123.35	0.9273
p091	Male	38	18	OBI	Y	-	+	608.68	+	+	-	+	14.7922	96.16	48.55	0.1722	136.74	0.9342
p092	Male	46	17.2	HBsAg+	-	+	+	0.56	-	+	-	+	9.8401	95.76	49.04	0.1439	88.6	0.9022
p093	Male	50	17.8	OBI	-	-	+	8.32	-	+	-	-	11.6064	97.31	49.55	0.2195	110.46	0.9254
p094	Male	19	30.8	HBsAg+	-	+	+	0.73	-	+	-	+	12.6124	96.51	49.11	0.1903	116.08	0.9242
p095	Male	30	35.3	OBI	-	-	+	0.74	-	+	-	+	17.0969	96.29	51.27	0.2176	159.31	0.9362
p096	Male	54	21.3	HBsAg+	-	+	+	0.13	-	+	-	+	12.0298	96.15	49.87	0.1762	107.73	0.9202
p097	Female	20	9.41	HBsAg+	-	+	+	518.33	+	+	-	+	19.6577	96.6	49.87	0.2325	182.79	0.9454
p098	Male	61	16.5	OBI	-	-	+	7.45	-	+	-	+	11.38	96.11	49.3	0.2756	105.03	0.92
p099	Male	47	23.2	OBI	-	-	+	2.09	-	+	-	+	15.2315	96.5	49.78	0.1931	132.61	0.9317
p100	Male	54	25.6	HBsAg+	-	+	+	0.76	-	+	-	+	15.3704	96.5	50.14	0.2391	145.52	0.9363
p101	Female	35	14	OBI	-	-	+	5.18	-	+	-	-	11.3746	95.05	49.77	0.2519	109.32	0.9259
p102	Male	35	17.1	OBI	-	-	+	111.32	+	+	-	-	11.0131	97.33	49.45	0.2053	101.05	0.9176
p103	Female	51	142	HBsAg+	-	+	+	0	-	+	-	+	18.9197	96.68	50.34	0.2074	173.98	0.944
p104	Male	51	14.6	OBI	Y	-	+	2.47	-	+	-	-	12.8902	97.53	49.25	0.2396	124.62	0.9356
p105	Male	41	20.601	OBI	Y	-	+	329.85	+	+	-	+	14.3914	96.78	49.11	0.2407	134.66	0.9342
p106	Male	30	9.5	OBI	-	-	+	31.92	+	+	-	+	10.7353	96.52	50.01	0.2045	99.51	0.9114
p107	Male	52	27.1	OBI	-	-	+	2.02	-	+	-	+	10.674	97.49	49.82	0.2134	102.53	0.922
p108	Female	23	28.4	OBI	-	-	+	0.06	-	+	-	+	11.7497	96.49	48.83	0.2009	105.35	0.9181
p109	Male	36	16.635	HBsAg+	-	+	+	0	-	+	-	+	10.9765	97.79	48.88	0.2955	103.33	0.9188
p110	Male	33	29.559	HBsAg+	-	+	+	0.12	-	+	-	+	12.148	97.36	49.56	0.2119	113.03	0.9267
p111	Male	49	9.968	HBsAg+	-	+	+	16.45	+	+	-	+	15.3595	95.9	49.22	0.1924	146.78	0.9416
p112	Female	34	14.9	HBsAg+	-	+	+	1.15	-	+	-	+	17.4244	96.55	49.64	0.2159	152.02	0.9372
p113	Male	35	18.5	OBI	-	-	+	90.46	+	+	-	-	11.9378	96.5	48.57	0.2009	107.82	0.919
p114	Male	43	21.3	OBI	-	-	+	78.62	+	+	-	-	21.0127	96.22	49.35	0.2791	197.97	0.9503
p115	Male	36	34	HBsAg+	Y	+	+	0.36	-	+	-	+	13.4328	95.95	49.09	0.2833	125.08	0.9342
p116	Male	49	18.7	OBI	-	-	+	18.82	+	+	-	-	15.0494	96.72	48.43	0.2477	135.46	0.9323
p117	Male	44	29	OBI	-	-	+	15.42	+	+	-	+	13.4528	97.52	49.85	0.2239	126.34	0.9344
p118	Female	34	14.4	HBsAg+	-	+	+	1.96	-	+	-	+	18.4061	96.66	50.08	0.2261	173.77	0.9451
p119	Male	32	22	HBsAg+	-	+	+	0.75	-	+	+	-	10.6936	95.79	48.87	0.2642	99.38	0.9153
p120	Male	52	42.2	OBI	-	-	+	0.31	-	+	-	-	11.9197	96.58	48.78	0.2113	110.48	0.9208
p121	Male	38	12.4	OBI	-	-	+	1.8	-	+	-	+	13.5994	96.87	49.18	0.2239	124.5	0.9302
p122	Male	31	18.4	OBI	-	-	+	216.03	+	-	-	-	13.5755	97.07	48.98	0.2223	124.7	0.9311
p123	Male	35	27.349	HBsAg+	-	+	+	1.73	-	+	-	+	10.8716	95.9	48.87	0.2792	101.92	0.9197
p124	Male	28	15.5	OBI	-	-	+	146.8	+	+	-	-	14.0149	96.72	49.05	0.2418	123.23	0.9283
p125	Male	40	18.065	HBsAg+	-	+	+	0.63	-	+	-	+	12.1049	93.75	50.21	0.2126	114.07	0.9214
p126	Female	51	12.1	HBsAg+	-	+	+	0.64	-	+	-	+	14.7953	95.97	48.77	0.1793	136.2	0.9336
p127	Male	40	16.659	OBI	-	-	+	28.3	+	+	-	+	10.1519	95.97	49.27	0.2199	93.17	0.9096
p128	Male	48	13.549	OBI	-	-	+	142.01	+	+	-	-	14.7429	92.82	50.96	0.1854	139.35	0.9273
p129	Female	55	25.3	OBI	-	-	+	0.92	-	+	-	+	11.3861	96.59	48.36	0.2133	103.17	0.9112
p130	Male	50	26.3	OBI	-	-	+	6.8	-	+	-	-	21.0828	96.64	48.49	0.2475	193.72	0.9505
p131	Male	43	40.6	HBsAg+	-	+	+	0.21	-	+	-	+	11.7498	97.69	49.26	0.2088	108.73	0.9258
p132	Male	43	25.5	OBI	-	-	+	56.31	+	+	-	-	13.4978	97.08	48.14	0.1796	121.89	0.927
p133	Male	56	23.928	OBI	Y	-	+	4.1	-	+	-	+	16.1133	96.6	49.1	0.2658	148.9	0.9405
p134	Female	45	15	OBI	-	-	+	3.21	-	+	-	+	11.2428	95.41	49.05	0.2254	102.64	0.9188
p135	Female	18	5	HBsAg+	-	+	+	0	-	+	-	+	12.9056	97.63	49.09	0.2151	116.73	0.9267
p136	Female	35	14	OBI	-	-	+	3.95	-	-	-	-	17.8611	96.91	48.92	0.2233	159.62	0.9401
p137	Female	20	6.8	HBsAg+	-	+	+	1.19	-	+	-	+	14.1533	97.45	49.24	0.2202	129.55	0.9355
p138	Male	20	20.5	OBI	-	-	+	1.39	-	+	-	+	11.5691	95.52	49.3	0.2388	109.01	0.9242
p139	Male	23	15.4	HBsAg+	-	+	+	0	-	+	-	+	12.2933	97.55	49.41	0.182	112.1	0.9261
p140	Male	49	27.8	OBI	-	-	+	11.53	+	+	-	+	11.0644	97.02	48.95	0.2011	104.25	0.9219
p141	Female	21	11.5	HBsAg+	-	+	+	1.27	-	+	-	+	10.6414	95.75	49.5	0.2675	103.62	0.9201
p142	Male	56	31.5	OBI	-	-	+	11.89	+	+	-	+	9.9239	97.64	49.61	0.2099	94.37	0.9132
p143	Female	21	14.9	HBsAg+	-	+	+	0.24	-	+	-	+	10.828	97.6	49.93	0.2796	103.35	0.9176
p144	Female	18	15.9	HBsAg+	-	+	+	0.3	-	+	-	+	12.4037	97.4	50.13	0.2298	121.29	0.934
p145	Female	18	13.2	HBsAg+	-	+	+	0.92	-	+	-	+	12.9386	97.59	49.76	0.1939	112.49	0.9225
p146	Male	19	33.5	HBsAg+	-	+	+	1.39	-	+	-	+	12.6529	97.15	49.37	0.1554	111.22	0.9193
p147	Male	30	34.8	HBsAg+	-	+	+	0.15	-	+	-	-	10.2768	92.46	49.66	0.2209	96.41	0.9104

## Sheet: Table S2
Table S2.Variants prioritization in exon2/3 region of HLA-A, B, DRB1, DRB4, DQA1, DQB1 genes.
Note: high-freq allele as reference allele, low-freq allele as effect allele
Gene Name	ID	GRCh38.p14				#reference allele		#effect allele		Odd ratio	95%CI	P	Padj(BH)	reference AF	effect AF	OBI freq in reference allele	OBI freq in effect allele	Annotation
	ID	CHR	BP	reference allele	effect allele	OBI	HBsAg+	OBI	HBsAg+									Transcript ID	Variant Type	Exon location	cDNA	protein
HLA-DRB4	rs1135085	HSCHR6_MHC_SSTO_CTG1	3853092	C	T	75	54	7	28	0.18	0.07-0.44	4.80968e-05	0.00235674	0.438776	0.119048	0.581395	0.2	NM_021983.4_2	synonymous	’3/6	c.642G>A	p.Thr214Thr
HLA-A	rs1136692	6	29943024	C	A	105	80	43	66	0.496392	0.3-0.8	0.00212694	0.0521101	0.629252	0.370748	0.567568	0.394495	NM_002116.8	missense	‘2/8	c.341C>A	p.Ala114Asp
HLA-C	rs713032	6	31271273	G	A	73	54	21	37	0.419845	0.22-0.8	0.00408608	0.0667393	0.431973	0.197279	0.574803	0.362069	NM_002117.6	missense	‘3/8	c.419C>T	p.Ser140Phe
HLA-DQA1	rs10093	6	32641396	C	G	99	82	47	64	0.60827	0.38-0.98	0.0267562	0.295597	0.615646	0.377551	0.546961	0.423423	NM_002122.5	missense	’2/5	c.169C>G	p.Gln57Glu
HLA-C	rs1131118	6	31271331	T	A	86	102	60	44	1.61734	1-2.62	0.0332693	0.295597	0.639456	0.353741	0.457447	0.576923	NM_002117.6	missense	‘3/8	c.361A>T	p.Arg121Trp
HLA-DQB1	rs1049073	6	32664940	G	A	89	73	57	73	0.640449	0.4-1.02	0.0385833	0.295597	0.55102	0.442177	0.549383	0.438462	NM_001243961.2	synonymous	‘2/5	c.237C>T	p.Tyr79Tyr
HLA-DQB1	rs1130389	6	32664850	C	T,G	119	106	27	40	0.601261	0.35-1.05	0.0472266	0.295597	0.765306	0.227891	0.528889	0.402985	NM_001243961.2	synonymous,synonymous	‘2/5	c.327G>C/A	p.Thr109Thr/Thr
HLA-A	rs1059536	6	29943448	A	G	100	108	48	34	1.52471	0.91-2.56	0.0700209	0.295597	0.707483	0.278912	0.480769	0.585366	NM_002116.8	missense	‘3/8	c.524A>G	p.His175Arg
HLA-C	rs2308585	6	31271206	C	G	77	89	71	57	1.43974	0.91-2.29	0.0767526	0.295597	0.564626	0.435374	0.463855	0.554688	NM_002117.6	synonymous	‘3/8	c.486C>G	p.Thr162Thr
HLA-B	rs1050538	6	31356822	T	G	100	84	46	56	0.69	0.42-1.12	0.0844546	0.295597	0.62585	0.346939	0.543478	0.45098	NM_005514.8	missense	‘2/8	c.209A>C	p.Glu70Ala
HLA-C	rs1050366	6	31271180	C	A	108	117	40	29	1.49425	0.87-2.58	0.0947017	0.295597	0.765306	0.234694	0.48	0.57971	NM_002117.6	missense	‘3/8	c.512T>G	p.Leu171Trp
HLA-DQA1	rs1129753	6	32641353	C	T	119	109	27	37	0.668408	0.38-1.17	0.101375	0.295597	0.77551	0.217687	0.52193	0.421875	NM_002122.5	synonymous	‘2/5	c.126C>T	p.Tyr42Tyr
HLA-DQA1	rs3205916	6	32641329	T	C	110	98	34	44	0.68843	0.41-1.16	0.102444	0.295597	0.707483	0.265306	0.528846	0.435897	NM_002122.5	synonymous	‘2/5	c.102T>C	p.Cys34Cys
HLA-DQA1	rs9272697	6	32641446	G	T	100	109	46	35	1.43257	0.85-2.4	0.108198	0.295597	0.710884	0.27551	0.478469	0.567901	NM_002122.5	missense	‘2/5	c.219G>T	p.Glu73Asp
HLA-DQA1	rs9272698	6	32641447	T	C	100	109	46	35	1.43257	0.85-2.4	0.108198	0.295597	0.710884	0.27551	0.478469	0.567901	NM_002122.5	missense	‘2/5	c.220T>C	p.Phe74Leu
HLA-DQA1	rs9272699	6	32641452	C	A	100	109	46	35	1.43257	0.85-2.4	0.108198	0.295597	0.710884	0.27551	0.478469	0.567901	NM_002122.5	missense	’2/5	c.225C>A	p.Ser75Arg
HLA-DQA1	rs1048052	6	32641453	A	C	100	109	46	35	1.43257	0.85-2.4	0.108198	0.295597	0.710884	0.27551	0.478469	0.567901	NM_002122.5	missense	‘2/5	c.226A>C	p.Lys76Gln
HLA-DQA1	rs1142326	6	32641435	C	T,A	90	101	56	45	1.39654	0.86-2.27	0.109245	0.295597	0.64966	0.343537	0.471204	0.554455	NM_002122.5	missense,synonymous	‘2/5	c.208C>T/A	p.Arg70Trp/Arg
HLA-B	rs1131215	6	31356739	A	C	92	105	46	37	1.41892	0.85-2.38	0.114619	0.295597	0.670068	0.282313	0.467005	0.554217	NM_005514.8	missense	‘2/8	c.292G>T	p.Asp98Tyr
HLA-DQA1	rs1129759	6	32641365	C	G	118	109	28	37	0.699038	0.4-1.22	0.130162	0.297736	0.772109	0.221088	0.519824	0.430769	NM_002122.5	synonymous	‘2/5	c.138C>G	p.Gly46Gly
HLA-DQA1	rs1048023	6	32641373	C	G	118	109	28	37	0.699038	0.4-1.22	0.130162	0.297736	0.772109	0.221088	0.519824	0.430769	NM_002122.5	missense	‘2/5	c.146C>G	p.Thr49Ser
HLA-DQB1	rs281862065	6	32664993	A,G	T	132	138	14	8	1.82955	0.74-4.5	0.133677	0.297736	0.918367	0.0748299	0.488889	0.636364	NM_001243961.2	missense,missense	‘2/6	-	-
HLA-DQA1	rs1142323	6	32641415	A	G	99	108	47	38	1.34928	0.81-2.24	0.151362	0.30903	0.704082	0.289116	0.478261	0.552941	NM_002122.5	missense	‘2/5	c.188A>G	p.Glu63Gly
HLA-DQA1	rs3207984	6	32641437	G	T	99	108	47	38	1.34928	0.81-2.24	0.151362	0.30903	0.704082	0.289116	0.478261	0.552941	NM_002122.5	synonymous	‘2/5	c.210G>T	p.Arg70Arg
HLA-DQA1	rs12722069	6	32641454	A	G	110	100	36	44	0.743802	0.44-1.25	0.160554	0.314687	0.714286	0.272109	0.52381	0.45	NM_002122.5	missense	‘2/5	c.227A>G	p.Lys76Arg
HLA-C	rs707911	6	31271800	A	C	78	69	66	75	0.778462	0.49-1.24	0.172846	0.319081	0.5	0.479592	0.530612	0.468085	NM_002117.6	missense	‘2/8	c.142T>G	p.Ser48Ala
HLA-DQA1	rs1129765	6	32641404	C	T	110	102	36	44	0.758678	0.45-1.27	0.179206	0.319081	0.721088	0.272109	0.518868	0.45	NM_002122.5	synonymous	‘2/5	c.177C>T	p.Tyr59Tyr
HLA-B	rs1421892555	6	31356417	G	A	91	79	55	61	0.782742	0.49-1.26	0.185293	0.319081	0.578231	0.394558	0.535294	0.474138	NM_005514.8	synonymous	‘3/8	c.369C>T	p.Tyr123Tyr
HLA-DQA1	rs12722061	6	32641444	G	C	109	100	37	44	0.771476	0.46-1.29	0.195356	0.319081	0.710884	0.27551	0.521531	0.45679	NM_002122.5	missense	‘2/5	c.217G>C	p.Glu73Gln
HLA-DQA1	rs3207985	6	32641450	A	C	109	100	37	44	0.771476	0.46-1.29	0.195356	0.319081	0.710884	0.27551	0.521531	0.45679	NM_002122.5	missense	‘2/5	c.223A>C	p.Ser75Arg
HLA-C	rs1050371	6	31271233	G	A	102	93	46	53	0.791343	0.49-1.28	0.205118	0.324218	0.663265	0.336735	0.523077	0.464646	NM_002117.6	synonymous	‘3/8	c.459C>T	p.Asp153Asp
HLA-B	rs709053	6	31356300	C	G	74	80	74	66	1.21212	0.77-1.92	0.240059	0.350471	0.52381	0.47619	0.480519	0.528571	NM_005514.8	synonymous	‘3/8	c.486G>C	p.Thr162Thr
HLA-DQB1	rs1130375	6	32665043	C	G	82	95	52	49	1.22947	0.75-2.01	0.241035	0.350471	0.602041	0.343537	0.463277	0.514851	NM_001243961.2	missense	‘2/6	c.134G>C	p.Gly45Ala
HLA-B	rs151341293	6	31356259	A	T	99	91	49	55	0.818916	0.51-1.32	0.243184	0.350471	0.646259	0.353741	0.521053	0.471154	NM_005514.8	missense	‘3/8	c.527A>T	p.Glu176Val
HLA-B	rs9266144	6	31356248	G,C	A	121	114	27	32	0.794938	0.45-1.41	0.260864	0.36521	0.79932	0.20068	0.514894	0.457627	NM_005514.8	missense,missense	‘3/8	-	-
HLA-B	rs1131112	6	31356407	C	G	112	115	34	29	1.20382	0.69-2.11	0.305978	0.41647	0.772109	0.214286	0.493392	0.539683	NM_005514.8	missense	‘3/8	c.379G>C	p.Val127Leu
HLA-DQB1	rs992025411	6	32665041	T	G	109	111	27	33	0.833194	0.47-1.48	0.316402	0.419019	0.748299	0.204082	0.495455	0.45	NM_001243961.2	missense	‘2/6	c.136A>C	p.Met46Leu
HLA-C	rs747944388	6	31271825	G	A	107	108	33	28	1.18959	0.67-2.1	0.325837	0.420159	0.731293	0.207483	0.497674	0.540984	NM_002117.6	synonymous	‘2/8	c.117C>T	p.Pro39Pro
HLA-DQB1	rs9274407	6	32665055	T	A	98	111	32	31	1.16919	0.67-2.05	0.344375	0.429502	0.710884	0.214286	0.4689	0.507937	NM_001243961.2	missense	‘2/6	c.122T>A	p.Phe41Tyr
HLA-A	rs12721675	6	29942827	C	A	85	90	49	46	1.12788	0.68-1.86	0.36523	0.429502	0.595238	0.323129	0.485714	0.515789	NM_002116.8	synonymous	‘2/8	c.144C>A	p.Ala48Ala
HLA-C	rs41542719	6	31271816	T	C	95	90	47	50	0.890526	0.54-1.46	0.36809	0.429502	0.629252	0.329932	0.513514	0.484536	NM_002117.6	synonymous	‘2/8	c.126A>G	p.Gly42Gly
HLA-C	rs1050437	6	31271808	C	T	105	100	39	42	0.884354	0.53-1.48	0.368145	0.429502	0.697279	0.27551	0.512195	0.481481	NM_002117.6	missense	‘2/8	c.134G>A	p.Arg45His
HLA-C	rs1131123	6	31271601	G	T	97	94	49	52	0.913164	0.56-1.48	0.402854	0.459067	0.64966	0.343537	0.507853	0.485149	NM_002117.6	missense	‘2/8	c.341A>C	p.Asp114Ala
HLA-DQB1	rs1130397	6	32664810	A	G	112	108	32	34	0.907563	0.52-1.57	0.418731	0.466314	0.748299	0.22449	0.509091	0.484848	NM_001243961.2	synonymous	‘2/5	c.367T>C	p.Leu123Leu
HLA-C	rs1050357	6	31271103	C	T	114	112	32	34	0.924665	0.53-1.6	0.444407	0.471186	0.768707	0.22449	0.504425	0.484848	NM_002117.6	missense	‘3/8	c.589G>A	p.Glu197Lys
HLA-DQB1	rs17412833	6	32664821	A	T	114	112	32	34	0.924665	0.53-1.6	0.444407	0.471186	0.768707	0.22449	0.504425	0.484848	NM_001243961.2	missense	‘2/6	c.356T>A	p.Phe119Tyr
HLA-C	rs41543814	6	31271653	T	C	90	92	56	54	1.06008	0.66-1.7	0.451954	0.471186	0.619048	0.37415	0.494505	0.509091	NM_002117.6	missense	‘2/8	c.289G>A	p.Ala97Thr
HLA-B	rs697742	6	31356247	A	C,T	110	110	38	36	1.05556	0.62-1.79	0.473474	0.475173	0.748299	0.251701	0.5	0.513514	NM_005514.8	missense,missense	‘3/8	c.539T>G/A	p.Leu180Arg/Gln
HLA-C	rs34592426	6	31271313	G	C	116	113	32	33	0.944619	0.54-1.64	0.475173	0.475173	0.778912	0.221088	0.50655	0.492308	NM_002117.6	missense	‘3/8	c.379C>G	p.Leu127Val

## Sheet: Table S3
Table S3. Baseline characteristics and HBV serological indicators of 19 vaccinated donors in the study
Confirmatory Phase	HBsAg+ (control)	OBI (case)
Sample size	7	12
Median age (IQR)	33 (25-36)	45 (38.8-50.5)
Gender (Male/Female)	5/2	10/2
Median anti-HBs (mIU/mL) (IQR)	0.9 (0.3-2.4)	27.2 (5.9-318.8)
anti-HBs (+/-)	0/7	9/3
anti-HBc (+/-)	0/7	12/0
HBeAg (+/-)	1/6	1/11
anti-HBe (+/-)	6/1	6/6
