# Supplementary material for: Exploratory analysis of HLA variants and occult HBV infection: a multicenter case-control study in Chinese blood donors
Source: Research Square preprint supplement (doi:10.21203/rs.3.rs-7323223/v1), 2025-09-01
Supplement: Supplementary file 5 [file Table S4-BA_prediction.xlsx]

## Sheet: A
Table S4. Binding stability and affinity prediction results
Notes: No HLA-C alleles were included in the training data of NetMHCstabpan, and HLA-C*04:313 could not be predicted by this tool. Although known HBsAg epitopes bound to HLA-C*03:40 exhibited statistically longer half-lives compared to HLA-C*03:26—supporting our findings—these results were not included in the manuscript.
(A) Binding stability results of known HBsAg epitopes to HLA-A*66:01, *68:01, *69:01 and HLA-C*03:26 and HLA-C*03:40 by NetMHCstabpan-1.0
Peptide	Length	Thalf(h)
		HLA-A66:01	HLA-A68:01	HLA-A69:01	HLA-C03:26	HLA-C03:40
DPRVRGLY	8	0.1261	0.1246	0.0835	0.0989	0.1292
FVQWFVGL	8	0.1556	0.2047	0.3824	0.2274	0.228
ILSPFLPL	8	0.123	0.1641	0.2626	0.2294	0.2228
ISSISART	8	0.0946	0.127	0.1221	0.1034	0.1282
LLTRILTI	8	0.1076	0.1425	0.2455	0.1749	0.1457
LYNILSPF	8	0.0948	0.1328	0.1119	0.1141	0.171
PNPLGFFP	8	0.0536	0.063	0.0628	0.0571	0.0647
QLDPAFGA	8	0.1108	0.1286	0.1684	0.1548	0.1391
VWLSVIWM	8	0.0922	0.1394	0.1482	0.0973	0.1095
WASVRFSW	8	0.1068	0.1836	0.1616	0.1234	0.1393
NPDWDFNP	8	0.0657	0.0813	0.0993	0.1267	0.1277
GGTPACPG	8	0.0657	0.0785	0.0826	0.073	0.0851
MFPSCCCT	8	0.0783	0.1022	0.1296	0.1008	0.0987
PHGGLLGW	8	0.0641	0.0808	0.0835	0.0709	0.0753
FLWEWASA	8	0.1383	0.2181	0.6255	0.2867	0.2643
LLGWSPQA	8	0.1091	0.1507	0.2079	0.1416	0.1387
LDPAFGAN	8	0.0545	0.0595	0.0591	0.0669	0.0817
WLSLLVPF	8	0.1175	0.1536	0.1985	0.154	0.1844
TTSTGPCK	8	0.295	0.954	0.1713	0.0954	0.1503
SNNPDWDF	8	0.0757	0.0989	0.0934	0.0864	0.1018
TGPCKTCT	8	0.0693	0.0847	0.1004	0.0839	0.0952
CPGYRWMCL	9	0.0924	0.103	0.1378	0.1446	0.1384
CTKPTDGNC	9	0.1221	0.1479	0.1266	0.1172	0.1199
DPRVRGLYF	9	0.1273	0.1369	0.097	0.1123	0.1437
FLGGTPVCL	9	0.1148	0.1436	0.2235	0.1853	0.173
FLGGTRVCL	9	0.1138	0.1417	0.2214	0.1871	0.1771
FLGGTTVCL	9	0.1261	0.1643	0.2628	0.2051	0.1916
FLLTKILTI	9	0.117	0.1431	0.3066	0.1709	0.1478
FLLTRILTI	9	0.1185	0.1433	0.3249	0.1772	0.1522
FLLTRILTL	9	0.1243	0.146	0.3014	0.1976	0.189
FTPPHGGLL	9	0.1401	0.1579	0.1989	0.1479	0.1972
GLLGWSPQA	9	0.1513	0.1856	0.1841	0.1284	0.1314
GLSPTVWLS	9	0.0996	0.1573	0.1363	0.1002	0.1107
ILLLCLIFL	9	0.1029	0.1444	0.193	0.1414	0.1321
ILSPFLPLL	9	0.1165	0.1635	0.2533	0.1904	0.1884
IPIPSSWAF	9	0.1137	0.1683	0.1628	0.2515	0.3483
IVSPFIPLL	9	0.166	0.2764	0.4028	0.2332	0.2583
KFLWEWASA	9	0.0915	0.1071	0.1494	0.1152	0.1075
LDYQGMLPV	9	0.1018	0.115	0.1701	0.1556	0.1546
LLCLIFLLV	9	0.1278	0.1961	0.3168	0.1525	0.1333
LLDPRVRGL	9	0.102	0.1081	0.145	0.1483	0.1419
LLDYQGMLP	9	0.0865	0.1102	0.1122	0.0942	0.0935
LLLCLIFLL	9	0.1036	0.1921	0.2998	0.1607	0.1472
LLPFVQWFV	9	0.1042	0.1885	0.3326	0.1408	0.1191
LLPIFFCLW	9	0.0838	0.1318	0.1202	0.0827	0.0975
LVLQAGFFL	9	0.1449	0.2961	0.4404	0.2189	0.2084
LVPFVQWFV	9	0.1349	0.313	0.5386	0.1649	0.1553
LYNILSPFL	9	0.0829	0.1215	0.1187	0.1169	0.1241
LYSILSPFL	9	0.0818	0.1212	0.1183	0.108	0.1136
MMWYWGPSL	9	0.096	0.1346	0.2655	0.2353	0.2203
NSNNPDWDF	9	0.1088	0.1776	0.1133	0.0905	0.1162
PFLPLLPIF	9	0.0713	0.0897	0.0844	0.0834	0.0988
PFVQWFVGL	9	0.0851	0.1062	0.1062	0.0861	0.0905
PLLPIFFCL	9	0.1081	0.159	0.1946	0.1352	0.1193
RFSWLSLLV	9	0.0987	0.1276	0.1885	0.1155	0.0994
RWMCLRRFI	9	0.0967	0.1192	0.1405	0.1365	0.1361
SLDSWWTSL	9	0.1101	0.1316	0.1694	0.1969	0.1604
SLDSWWTSV	9	0.1158	0.1431	0.2087	0.2029	0.1522
SSWAFARFL	9	0.109	0.1725	0.2275	0.1333	0.1351
STNRQSGRQ	9	0.104	0.1175	0.0833	0.0748	0.1027
SWLSLLVPF	9	0.0896	0.1271	0.1377	0.1146	0.1441
SWWTSLNFL	9	0.0833	0.1098	0.1429	0.1029	0.1063
TFHQALLDP	9	0.0743	0.0898	0.0907	0.0674	0.077
TKPSDGNCT	9	0.062	0.0668	0.0805	0.0821	0.0808
VLLDYQGML	9	0.1194	0.1522	0.177	0.1355	0.1252
VLQAGFFIL	9	0.1026	0.1358	0.1927	0.1789	0.1552
VLQAGFFLL	9	0.1088	0.1573	0.2147	0.1687	0.1473
WGPSLYSIL	9	0.0778	0.0859	0.0997	0.1078	0.1285
WLSLLVPFV	9	0.1111	0.1525	0.2904	0.1964	0.1454
YLLTRILTI	9	0.1273	0.1536	0.3605	0.1833	0.1555
ILSPFMPLL	9	0.1189	0.1645	0.2403	0.1831	0.1867
GGSYFMISR	9	0.1526	0.2852	0.1227	0.0788	0.1112
CRTCTTPAQ	9	0.0798	0.101	0.0859	0.0743	0.0894
CLIFLLVLL	9	0.1062	0.1432	0.2033	0.1278	0.1226
CLRRFIIFL	9	0.1485	0.1815	0.2347	0.1536	0.1728
FIIFLFILL	9	0.1305	0.2016	0.361	0.1806	0.1795
FLFILLLCL	9	0.1136	0.1758	0.2845	0.1729	0.1677
GMLPVCPLI	9	0.1245	0.1534	0.2523	0.1895	0.1522
HQLDPAFRA	9	0.1402	0.207	0.2564	0.1528	0.1704
IIFLFILLL	9	0.116	0.1764	0.254	0.1485	0.148
KVGAGAFGL	9	0.1212	0.1558	0.1867	0.1545	0.1398
LQAGFFLLT	9	0.1227	0.1713	0.1774	0.1275	0.1434
RVRGLYFPA	9	0.1858	0.2231	0.2875	0.2461	0.2888
SILSPFLPL	9	0.1452	0.1854	0.2788	0.1974	0.1944
TLPANPPPA	9	0.1001	0.1243	0.1763	0.1405	0.1393
AFAKYLWEW	9	0.0898	0.1384	0.1358	0.1031	0.1191
AMQWNSTTF	9	0.1086	0.1334	0.1652	0.1566	0.185
FMPLLPIFF	9	0.0914	0.1236	0.1407	0.1014	0.127
FVGLSPTVW	9	0.1021	0.1669	0.14	0.1142	0.1309
FWGPSLYNI	9	0.0734	0.1059	0.1441	0.097	0.0931
KANSENPDW	9	0.0942	0.1335	0.1149	0.1124	0.1272
KYLWEWASV	9	0.1016	0.1251	0.1616	0.1256	0.1183
LQDPRVRAL	9	0.1077	0.1034	0.1338	0.1842	0.1764
LSVPNPLGF	9	0.1345	0.1668	0.1314	0.1193	0.1462
LWEWASVRF	9	0.0865	0.1147	0.1	0.095	0.1145
MENIASGLL	9	0.0948	0.1067	0.1177	0.1323	0.1241
MMWFWGPSL	9	0.0921	0.1278	0.2359	0.231	0.2145
PFMPLLPIF	9	0.0795	0.1057	0.1059	0.0938	0.1173
PTVWLSVIW	9	0.1053	0.1822	0.1228	0.0879	0.0934
QAGFFLLTK	9	0.2702	0.4778	0.1778	0.0878	0.1252
STISSILSK	9	1.2436	2.2531	0.2858	0.1143	0.194
STTSMGPCK	9	0.3177	0.9926	0.1949	0.1022	0.157
STTSTGPCK	9	0.2849	0.792	0.1737	0.1013	0.1559
SVIWMMWFW	9	0.1431	0.4408	0.3224	0.1094	0.1269
SVIWMMWYW	9	0.1387	0.4069	0.3177	0.1091	0.1265
SWAFAKYLW	9	0.0834	0.1459	0.1221	0.0949	0.0983
TTSGFLGPL	9	0.1959	0.2303	0.2596	0.1818	0.1866
GYRWMCLRR	9	0.1222	0.1929	0.1114	0.0809	0.103
YLWEWASVR	9	0.2907	0.6915	0.4154	0.1509	0.2432
FLGGPPVCL	9	0.1194	0.1415	0.2195	0.184	0.1719
GGPNLDNIL	9	0.0644	0.0746	0.0813	0.0841	0.091
ILRSFIPLL	9	0.1366	0.1606	0.2475	0.2053	0.2067
WLSLLVQFV	9	0.11	0.1502	0.2651	0.1803	0.1331
LCLIFLLVL	9	0.095	0.1086	0.1408	0.1402	0.1321
VGLSPTVWL	9	0.0907	0.1112	0.1229	0.1128	0.1239
NLLGWSPQA	9	0.1445	0.1795	0.2361	0.1318	0.1342
PNPLGFFPD	9	0.0502	0.0597	0.0641	0.0528	0.0545
SNNPDWDFN	9	0.0638	0.0708	0.0677	0.0568	0.0602
ILSPFIPLL	9	0.1234	0.1763	0.2799	0.1977	0.1955
TLSPFLPLL	9	0.1187	0.169	0.2522	0.1858	0.18
FLWEWASVR	9	0.259	0.6386	0.3951	0.153	0.2518
LFILLLCLI	9	0.081	0.1125	0.1421	0.1033	0.0961
QAGFFLLTR	9	0.3129	0.9294	0.2043	0.0853	0.1235
QAGFFSLTK	9	0.2502	0.4896	0.1623	0.0907	0.1316
SAISSISSK	9	0.6032	0.7842	0.2394	0.1363	0.2313
SPISSIFSR	9	0.2746	0.6592	0.3854	0.1586	0.2871
WTSLNFLGG	9	0.1156	0.141	0.1454	0.113	0.1228
GMLPVCPLL	9	0.1212	0.1537	0.2358	0.1999	0.1678
IASGLLGPL	9	0.1305	0.1536	0.1889	0.2325	0.256
ITSGFLGPL	9	0.1871	0.2235	0.2727	0.2102	0.2179
PQSLDSWLT	9	0.0697	0.0897	0.093	0.085	0.0797
QSPTSNHSL	9	0.112	0.1328	0.136	0.1265	0.1435
SAISSTFSK	9	0.4438	1.6019	0.3108	0.127	0.2171
STISSTFSK	9	0.9513	5.0114	0.348	0.1184	0.2161
TASPISSIF	9	0.1313	0.1942	0.1568	0.166	0.222
TASPLSSIF	9	0.1198	0.172	0.1491	0.1572	0.2094
TCIPIPSSW	9	0.0934	0.1371	0.1215	0.1183	0.1268
TIPQSLDSW	9	0.0842	0.1166	0.1021	0.0869	0.0924
TVSAISSTF	9	0.1756	0.2911	0.2143	0.1561	0.2033
LLGPLLVLL	9	0.0973	0.1312	0.189	0.1374	0.1356
ILNPFLPLL	9	0.1161	0.1627	0.2542	0.2128	0.2142
AFGKFLWEWA	10	0.0784	0.1093	0.1258	0.0871	0.0956
AILSKTGDPV	10	0.1314	0.1402	0.2392	0.1974	0.1593
EWASARFSWL	10	0.1085	0.1287	0.1367	0.1118	0.1272
FFLLTRILTI	10	0.083	0.1045	0.1608	0.1128	0.1037
FILLLCLIFL	10	0.1133	0.1686	0.3341	0.1789	0.1693
GLSPTVWLSV	10	0.1247	0.162	0.2386	0.1793	0.1476
HQLDPAFGAN	10	0.0989	0.115	0.1087	0.0895	0.1065
ILLLCLIFLL	10	0.0968	0.1485	0.2077	0.1418	0.131
ITSGFLGPLL	10	0.1671	0.2619	0.2896	0.1858	0.1941
LLDYQGMLPV	10	0.1004	0.1199	0.22	0.1784	0.142
LLLCLIFLLV	10	0.1124	0.1894	0.3303	0.1584	0.1323
LLPIFFCLWV	10	0.0964	0.122	0.2	0.1323	0.1128
LLVLQAGFFL	10	0.1141	0.159	0.2177	0.1595	0.1489
LLVPFVQWFV	10	0.1393	0.2421	0.4148	0.191	0.1698
LPLLPIFFCL	10	0.0903	0.133	0.2263	0.2296	0.214
LSPFLPLLPI	10	0.1024	0.1246	0.1689	0.142	0.1432
LSPTVWLSVI	10	0.0984	0.12	0.1508	0.1456	0.1531
LVLLDYQGML	10	0.1234	0.1534	0.1805	0.1393	0.1455
LVLQAGFFLL	10	0.1309	0.2504	0.3676	0.205	0.2001
MGTNLSVPNP	10	0.0728	0.0975	0.1058	0.0878	0.1168
MMWYWGPSLY	10	0.1216	0.2283	0.1692	0.1352	0.201
PLGFFPDHQL	10	0.087	0.1132	0.1266	0.0919	0.0891
QWFVGLSPTV	10	0.0946	0.1185	0.1748	0.1177	0.1074
RWMCLRRFII	10	0.0902	0.1144	0.1547	0.1456	0.1358
SARFSWLSLL	10	0.1382	0.1489	0.1491	0.17	0.2011
SIVSPFIPLL	10	0.1628	0.1978	0.2787	0.1977	0.1904
SLNFLGGTTV	10	0.1129	0.1344	0.2192	0.2023	0.1728
SMYPSCCCTK	10	0.2182	0.4199	0.2469	0.154	0.2923
TTASPISSIF	10	0.2408	0.3987	0.2249	0.1437	0.1885
WMMWYWGPSL	10	0.1039	0.1273	0.2803	0.2456	0.2064
WYWGPSLYNI	10	0.0844	0.1139	0.1792	0.1174	0.1031
WYWGPSLYSI	10	0.0852	0.1137	0.1989	0.1264	0.1083
YSILSPFLPL	10	0.1968	0.2599	0.3757	0.2455	0.2982
LLCLIFLLVL	10	0.1175	0.1652	0.2206	0.1603	0.1513
FIIFLFILLL	10	0.1369	0.1991	0.3506	0.1731	0.1736
FLFILLLCLI	10	0.1125	0.1784	0.3293	0.1641	0.146
FLGPLLVLQA	10	0.1256	0.1784	0.2825	0.1459	0.1552
FVGLSPTVWL	10	0.1392	0.1674	0.2459	0.1585	0.1731
LLVLLDYQGM	10	0.1155	0.1504	0.1734	0.1364	0.144
SILSPFLPLL	10	0.1339	0.1726	0.2601	0.1903	0.1789
SLYSILSPFL	10	0.1487	0.2159	0.3371	0.2055	0.1814
VLQAGFFLLT	10	0.1147	0.1656	0.172	0.1193	0.1169
YQGMLPVCPL	10	0.114	0.14	0.2388	0.2162	0.2046
PTPFSPPLRD	10	0.0623	0.0744	0.0704	0.0569	0.0644
STGPCKTCTT	10	0.1368	0.2117	0.2028	0.1338	0.1601
ASPISSIFSR	10	0.1841	0.4063	0.1286	0.09	0.1118
PFMPLLPIFF	10	0.0894	0.1318	0.12	0.0855	0.1051
TSCPPICPGY	10	0.1669	0.3732	0.1627	0.1135	0.1489
TSTTSMGPCK	10	0.2067	0.4233	0.1375	0.0911	0.1246
VIWMMWYWGR	10	0.1911	0.675	0.1992	0.0861	0.1296
VWLSVIWMMW	10	0.0775	0.1336	0.1151	0.0853	0.0942
WLSVIWMMWY	10	0.1353	0.1992	0.1434	0.1104	0.1407
STTSGFLGPL	10	0.198	0.2338	0.291	0.1773	0.1797
SVIWMMWYWG	10	0.1178	0.1926	0.181	0.1039	0.1246
LLGPLLVLQA	10	0.1129	0.1665	0.2066	0.1335	0.1376
SVISMMWYWG	10	0.1285	0.2096	0.1788	0.0985	0.1254
SVMWMMWYWG	10	0.121	0.2099	0.2005	0.1141	0.1361
FGANSNNPDW	10	0.0873	0.1293	0.1275	0.1117	0.1218
NILSPFIPLL	10	0.1342	0.1758	0.2632	0.1681	0.1708
NILSPFLPLL	10	0.1311	0.1678	0.2396	0.1614	0.1648
NILSPFMPLL	10	0.1345	0.1728	0.2418	0.1601	0.1669
SILSPFIPLL	10	0.1378	0.1823	0.2821	0.1984	0.1862
CPGYRWMCLR	10	0.1431	0.2938	0.1725	0.1087	0.1523
LQAGFFSLTK	10	0.1973	0.3408	0.2089	0.1186	0.1893
KPRKGMGTNL	10	0.0979	0.0934	0.1081	0.1954	0.2227
LQDPRVRALY	10	0.1269	0.1905	0.1306	0.1156	0.1609
LTIPQSLDSW	10	0.1271	0.231	0.1623	0.1331	0.1449
NITSGFLGPL	10	0.1404	0.1593	0.2086	0.162	0.1617
TRILTIPQSL	10	0.094	0.1073	0.1216	0.1461	0.1348
CIPIPSSWAF	10	0.1037	0.1392	0.1313	0.1068	0.1395
AFGPGFTPPHG	11	0.073	0.0926	0.0893	0.0734	0.086
ASARFSWLSLL	11	0.1462	0.2259	0.2555	0.1639	0.1728
ASPLSSIFSRI	11	0.1077	0.1207	0.1277	0.1189	0.1234
GFFLLTRILTI	11	0.0915	0.1108	0.1553	0.1008	0.0909
GFFPDHQLDPA	11	0.0859	0.1101	0.138	0.1164	0.1138
GWSPQAQGVLT	11	0.0715	0.0828	0.0943	0.0765	0.0804
LYSILSPFLPL	11	0.0942	0.1287	0.1344	0.1314	0.1426
RFSWLSLLVPF	11	0.1015	0.1321	0.1442	0.1189	0.1461
WASARFSWLSL	11	0.1376	0.1593	0.2335	0.2133	0.2172
WMMWYWGPSLY	11	0.1383	0.2051	0.1823	0.1555	0.2034
TTSGFLGPLLV	11	0.198	0.3358	0.3781	0.1945	0.1732
LTTVPAASLLA	11	0.171	0.2521	0.2795	0.1688	0.1869
TSMFPSCCCTK	11	0.3216	1.1257	0.229	0.1311	0.2164
TTSTGPCKTCT	11	0.1235	0.2004	0.1795	0.1224	0.141
VWLSVIWMMWF	11	0.0836	0.1238	0.1155	0.0876	0.1063
ENITSGFLGPL	11	0.1256	0.1272	0.149	0.1148	0.1209
FSLTKILTIPQ	11	0.1585	0.2327	0.1468	0.0963	0.1252
LTIPQSLDSWW	11	0.1262	0.2518	0.1656	0.1188	0.1348
LTRILTIPQSL	11	0.1651	0.1808	0.1904	0.167	0.2099
IPQSLDSWWTSL	12	0.0913	0.105	0.1358	0.2068	0.2145
IPQSLHSWWTSL	12	0.0932	0.1079	0.1392	0.2135	0.2241
KYLWEWASVRFS	12	0.0816	0.0972	0.1052	0.0851	0.0931
PLGFFPDHQLDP	12	0.0698	0.0789	0.0762	0.0596	0.0648
RVRGLYLPAGGS	12	0.1212	0.1144	0.119	0.1083	0.1302
TGPCKTCTIPAQ	12	0.072	0.0855	0.0849	0.0747	0.084
TGPCKTCTTPAQ	12	0.072	0.0854	0.0848	0.0727	0.0811
TGPCKTCTTTAQ	12	0.0728	0.0855	0.0817	0.0714	0.0791
TGPCRTCTIPAQ	12	0.0739	0.0861	0.0842	0.0751	0.0847
TGPCRTCTTLAQ	12	0.0751	0.0881	0.0834	0.0719	0.0801
TGPCRTCTTPAQ	12	0.074	0.086	0.0839	0.0733	0.0817
TGPCRTCTTTAQ	12	0.0746	0.0858	0.0808	0.072	0.0798
TRILTIPQSLDS	12	0.0712	0.0859	0.0889	0.0847	0.0907
TSLNFLGGSPVC	12	0.098	0.1306	0.1721	0.1695	0.152
WEWASVRFSWLS	12	0.0791	0.1126	0.1253	0.0964	0.1069
NSMFPSCCCTKP	12	0.1232	0.1536	0.1321	0.1047	0.1293
GFFLLTRILTIP	12	0.0808	0.0968	0.0913	0.0686	0.0745
VGLSPTVWLSVI	12	0.0826	0.0979	0.1143	0.1428	0.127
QDSRVRALYLPA	12	0.0841	0.0981	0.1194	0.1087	0.1219
LSTSNPLGFFPD	12	0.0775	0.1147	0.117	0.0796	0.0911
FSLTKILTIPQS	12	0.1266	0.1619	0.1802	0.117	0.1727
IASGLLGPLLVL	12	0.1232	0.154	0.1945	0.2117	0.2184
KILTIPQSLDSW	12	0.1054	0.1303	0.1106	0.1108	0.1312
MENIASGLLGPL	12	0.096	0.1078	0.1185	0.1632	0.1572
MENITSGFLGPL	12	0.096	0.1098	0.1199	0.1621	0.1578
WTSLNFLGGTTV	12	0.1537	0.1933	0.3258	0.2262	0.1911

## Sheet: B
(B) Binding results of known HBsAg epitopes to HLA-A*66:01, *68:01, *69:01 and HLA-C*03:26 and HLA-C*03:40 by NetMHCIIpan-4.3
Peptide	Length	BA-score
		HLA-A66:01	HLA-A68:01	HLA-A69:01	HLA-C03:26	HLA-C03:40	HLA-C04:01	HLA-C04:313
DPRVRGLY	8	0.0481	0.0293	0.0122	0.0056	0.0383	0.0193	0.0539
FVQWFVGL	8	0.0811	0.0499	0.2025	0.137	0.2382	0.0729	0.1005
ILSPFLPL	8	0.0584	0.0369	0.1226	0.1894	0.2931	0.111	0.144
ISSISART	8	0.0234	0.0206	0.0245	0.0201	0.0642	0.0217	0.0331
LLTRILTI	8	0.0314	0.0168	0.0624	0.0438	0.0935	0.0633	0.0784
LYNILSPF	8	0.0566	0.0395	0.0282	0.0495	0.2518	0.086	0.2353
PNPLGFFP	8	0.0083	0.0102	0.0102	0.0032	0.0073	0.0153	0.0151
QLDPAFGA	8	0.027	0.0184	0.0623	0.0095	0.0232	0.0386	0.0436
VWLSVIWM	8	0.0218	0.0303	0.0313	0.019	0.0509	0.0645	0.1133
WASVRFSW	8	0.0521	0.0655	0.0462	0.0582	0.2742	0.0541	0.1063
NPDWDFNP	8	0.0147	0.0147	0.0159	0.0097	0.0222	0.0231	0.0227
GGTPACPG	8	0.0084	0.0074	0.0056	0.0043	0.0101	0.015	0.0178
MFPSCCCT	8	0.0277	0.0328	0.0285	0.0123	0.0375	0.0558	0.0963
PHGGLLGW	8	0.0147	0.0111	0.0084	0.0049	0.0231	0.0167	0.0279
FLWEWASA	8	0.0444	0.0338	0.1273	0.0459	0.1379	0.0513	0.0783
LLGWSPQA	8	0.0188	0.0133	0.0318	0.0108	0.0324	0.0274	0.0402
LDPAFGAN	8	0.0133	0.0103	0.0078	0.0034	0.0108	0.0172	0.022
WLSLLVPF	8	0.0451	0.0404	0.0374	0.0474	0.1888	0.0612	0.1019
TTSTGPCK	8	0.0809	0.2007	0.0243	0.0072	0.0299	0.0202	0.0398
SNNPDWDF	8	0.0178	0.0153	0.0113	0.0111	0.0493	0.0368	0.0568
TGPCKTCT	8	0.0107	0.0081	0.0102	0.0054	0.0107	0.0172	0.0207
CPGYRWMCL	9	0.0584	0.0479	0.1166	0.0585	0.1216	0.1126	0.1215
CTKPTDGNC	9	0.0592	0.0467	0.0689	0.0297	0.0697	0.0293	0.0434
DPRVRGLYF	9	0.0884	0.0386	0.0343	0.032	0.1355	0.0615	0.1014
FLGGTPVCL	9	0.0538	0.0329	0.1487	0.2591	0.355	0.1654	0.2052
FLGGTRVCL	9	0.06	0.0361	0.1439	0.2118	0.3087	0.125	0.1685
FLGGTTVCL	9	0.0683	0.0413	0.1999	0.2745	0.3788	0.1692	0.2087
FLLTKILTI	9	0.0801	0.0413	0.309	0.2838	0.4607	0.1709	0.2249
FLLTRILTI	9	0.087	0.043	0.3088	0.297	0.4836	0.1739	0.2345
FLLTRILTL	9	0.105	0.0511	0.2754	0.4652	0.6273	0.2185	0.3075
FTPPHGGLL	9	0.3051	0.1306	0.344	0.4893	0.5403	0.291	0.377
GLLGWSPQA	9	0.0512	0.0335	0.1322	0.0269	0.0762	0.0516	0.0698
GLSPTVWLS	9	0.0468	0.0672	0.0961	0.0149	0.0389	0.0392	0.0552
ILLLCLIFL	9	0.0224	0.0318	0.092	0.0486	0.0957	0.063	0.0877
ILSPFLPLL	9	0.1121	0.0837	0.3196	0.2862	0.4215	0.21	0.2912
IPIPSSWAF	9	0.1209	0.1303	0.1711	0.2506	0.5341	0.1702	0.2443
IVSPFIPLL	9	0.2073	0.179	0.5349	0.4133	0.5766	0.1518	0.2471
KFLWEWASA	9	0.0403	0.0454	0.0841	0.0273	0.0853	0.068	0.1391
LDYQGMLPV	9	0.111	0.0771	0.236	0.1013	0.1479	0.0766	0.0899
LLCLIFLLV	9	0.0393	0.0622	0.1503	0.0298	0.0684	0.0458	0.0655
LLDPRVRGL	9	0.0532	0.0231	0.1366	0.1872	0.2481	0.224	0.2466
LLDYQGMLP	9	0.0235	0.0287	0.0561	0.0231	0.0481	0.0607	0.0773
LLLCLIFLL	9	0.0458	0.0848	0.2386	0.0649	0.1191	0.0915	0.1213
LLPFVQWFV	9	0.1301	0.1817	0.574	0.0622	0.1002	0.132	0.1746
LLPIFFCLW	9	0.056	0.0901	0.053	0.0347	0.1303	0.0409	0.1009
LVLQAGFFL	9	0.1043	0.1285	0.4254	0.237	0.3764	0.0874	0.1347
LVPFVQWFV	9	0.2056	0.2793	0.6998	0.0821	0.1382	0.1051	0.1507
LYNILSPFL	9	0.0616	0.0742	0.1142	0.1027	0.232	0.1681	0.3419
LYSILSPFL	9	0.0643	0.0839	0.1275	0.1055	0.2259	0.1601	0.321
MMWYWGPSL	9	0.152	0.1236	0.5204	0.463	0.6817	0.2303	0.3331
NSNNPDWDF	9	0.0626	0.0802	0.0716	0.0809	0.2772	0.0744	0.1315
PFLPLLPIF	9	0.0276	0.0242	0.0227	0.0171	0.0638	0.0588	0.1435
PFVQWFVGL	9	0.0549	0.037	0.0942	0.0198	0.0456	0.0464	0.0875
PLLPIFFCL	9	0.0372	0.0396	0.1704	0.0327	0.0574	0.0615	0.0768
RFSWLSLLV	9	0.0696	0.1011	0.2132	0.072	0.1577	0.1775	0.3117
RWMCLRRFI	9	0.0657	0.069	0.1252	0.0544	0.1193	0.1782	0.2807
SLDSWWTSL	9	0.09	0.0444	0.2208	0.2313	0.2858	0.2693	0.2932
SLDSWWTSV	9	0.0857	0.0493	0.3485	0.1212	0.1823	0.2122	0.2444
SSWAFARFL	9	0.1724	0.1775	0.4344	0.4004	0.5648	0.1489	0.2505
STNRQSGRQ	9	0.0867	0.0963	0.0224	0.0076	0.0404	0.0185	0.0352
SWLSLLVPF	9	0.0883	0.1024	0.0853	0.0708	0.2617	0.142	0.2612
SWWTSLNFL	9	0.0732	0.0861	0.1709	0.0728	0.158	0.2045	0.2969
TFHQALLDP	9	0.0226	0.0192	0.0287	0.0104	0.0289	0.0295	0.0471
TKPSDGNCT	9	0.0127	0.0065	0.008	0.0061	0.0127	0.0116	0.0159
VLLDYQGML	9	0.0731	0.0383	0.1442	0.1517	0.2395	0.1276	0.1725
VLQAGFFIL	9	0.0553	0.0483	0.1799	0.1597	0.2703	0.1129	0.1466
VLQAGFFLL	9	0.0731	0.0794	0.2664	0.137	0.2375	0.1465	0.1928
WGPSLYSIL	9	0.0722	0.0431	0.1086	0.2128	0.2383	0.1327	0.1584
WLSLLVPFV	9	0.0952	0.0856	0.4692	0.0641	0.1423	0.0965	0.1338
YLLTRILTI	9	0.0954	0.0437	0.3212	0.3002	0.4837	0.1843	0.2535
ILSPFMPLL	9	0.1302	0.0976	0.3457	0.3083	0.4532	0.2099	0.297
GGSYFMISR	9	0.111	0.4465	0.042	0.0103	0.0527	0.0334	0.0664
CRTCTTPAQ	9	0.0267	0.0285	0.011	0.0087	0.0448	0.0235	0.0496
CLIFLLVLL	9	0.0624	0.0703	0.1597	0.0511	0.1103	0.0432	0.0712
CLRRFIIFL	9	0.0537	0.0496	0.0912	0.0425	0.0993	0.0607	0.0984
FIIFLFILL	9	0.1554	0.1797	0.3961	0.2401	0.3862	0.0649	0.1053
FLFILLLCL	9	0.0524	0.05	0.1448	0.1923	0.3416	0.0764	0.1216
GMLPVCPLI	9	0.036	0.0299	0.1875	0.0636	0.1263	0.0943	0.1224
HQLDPAFRA	9	0.0576	0.0571	0.1693	0.0517	0.1131	0.0508	0.0765
IIFLFILLL	9	0.0841	0.1091	0.2296	0.1797	0.3046	0.0596	0.116
KVGAGAFGL	9	0.0636	0.0504	0.1601	0.0958	0.1605	0.0719	0.0941
LQAGFFLLT	9	0.0776	0.0861	0.1486	0.0592	0.1584	0.053	0.0819
RVRGLYFPA	9	0.123	0.1306	0.2122	0.0837	0.2179	0.0684	0.1271
SILSPFLPL	9	0.2273	0.1304	0.5542	0.4962	0.5956	0.1243	0.1931
TLPANPPPA	9	0.0981	0.0743	0.2224	0.0924	0.1592	0.0688	0.0975
AFAKYLWEW	9	0.0431	0.0482	0.0393	0.0191	0.0825	0.0469	0.1433
AMQWNSTTF	9	0.0746	0.0438	0.052	0.2642	0.5562	0.1418	0.2629
FMPLLPIFF	9	0.1036	0.1091	0.121	0.2	0.479	0.1563	0.3026
FVGLSPTVW	9	0.0688	0.0601	0.0517	0.1441	0.4431	0.0621	0.1444
FWGPSLYNI	9	0.0486	0.0519	0.1694	0.0676	0.1318	0.1635	0.2509
KANSENPDW	9	0.0192	0.0199	0.0178	0.0615	0.2247	0.0359	0.0769
KYLWEWASV	9	0.0483	0.0452	0.118	0.0462	0.1153	0.0992	0.1941
LQDPRVRAL	9	0.0484	0.0195	0.0877	0.3763	0.47	0.2049	0.2593
LSVPNPLGF	9	0.1477	0.0997	0.0954	0.4602	0.7999	0.0925	0.2077
LWEWASVRF	9	0.0341	0.0433	0.0376	0.0439	0.1554	0.274	0.4276
MENIASGLL	9	0.1104	0.0853	0.101	0.0861	0.1561	0.1115	0.1492
MMWFWGPSL	9	0.1456	0.1274	0.5227	0.4264	0.6608	0.2191	0.3052
PFMPLLPIF	9	0.0464	0.0352	0.0347	0.029	0.107	0.078	0.1948
PTVWLSVIW	9	0.0458	0.0564	0.0394	0.0212	0.0787	0.0244	0.0416
QAGFFLLTK	9	0.1624	0.4496	0.0749	0.0266	0.1226	0.0457	0.0736
STISSILSK	9	0.5154	0.7266	0.1465	0.0497	0.2261	0.0672	0.1274
STTSMGPCK	9	0.251	0.5342	0.0653	0.0225	0.0889	0.0491	0.087
STTSTGPCK	9	0.2491	0.5082	0.0668	0.0225	0.0958	0.0454	0.0806
SVIWMMWFW	9	0.1222	0.1794	0.1154	0.0383	0.1438	0.0347	0.0774
SVIWMMWYW	9	0.1434	0.2016	0.1296	0.0458	0.1707	0.0383	0.0871
SWAFAKYLW	9	0.0554	0.1186	0.0562	0.0257	0.0914	0.0873	0.201
TTSGFLGPL	9	0.4609	0.3395	0.6665	0.3817	0.4991	0.1179	0.1653
GYRWMCLRR	9	0.0607	0.1417	0.0241	0.0043	0.023	0.0282	0.0836
YLWEWASVR	9	0.2359	0.5268	0.1312	0.0326	0.177	0.0782	0.1811
FLGGPPVCL	9	0.058	0.0357	0.1919	0.2886	0.3567	0.1675	0.2023
GGPNLDNIL	9	0.0188	0.0126	0.0207	0.0449	0.0382	0.0449	0.0464
ILRSFIPLL	9	0.1035	0.0524	0.1798	0.1593	0.331	0.1309	0.2058
WLSLLVQFV	9	0.0918	0.0886	0.3926	0.0619	0.1406	0.0813	0.1222
LCLIFLLVL	9	0.0144	0.0113	0.0407	0.0845	0.1495	0.0294	0.0386
VGLSPTVWL	9	0.0358	0.0317	0.1297	0.2028	0.2294	0.086	0.1038
NLLGWSPQA	9	0.086	0.0694	0.3245	0.042	0.1157	0.0573	0.089
PNPLGFFPD	9	0.0071	0.0108	0.0086	0.0026	0.0052	0.0104	0.0101
SNNPDWDFN	9	0.0186	0.0341	0.0111	0.0044	0.0134	0.0123	0.0198
ILSPFIPLL	9	0.1227	0.0963	0.3703	0.3128	0.4626	0.2201	0.3086
TLSPFLPLL	9	0.1745	0.1219	0.4958	0.2408	0.3624	0.1754	0.2611
FLWEWASVR	9	0.235	0.5185	0.1231	0.0333	0.1809	0.0729	0.1726
LFILLLCLI	9	0.0426	0.05	0.0962	0.0367	0.0848	0.0526	0.1087
QAGFFLLTR	9	0.1843	0.5941	0.0882	0.0196	0.1023	0.0405	0.0812
QAGFFSLTK	9	0.1665	0.4949	0.0776	0.0346	0.1559	0.0521	0.0798
SAISSISSK	9	0.4861	0.6903	0.1208	0.0827	0.3341	0.062	0.1178
SPISSIFSR	9	0.2787	0.5672	0.1089	0.0177	0.076	0.0422	0.0737
WTSLNFLGG	9	0.1001	0.1	0.1388	0.0517	0.1355	0.0366	0.0506
GMLPVCPLL	9	0.0429	0.0349	0.1573	0.1123	0.1888	0.1181	0.1571
IASGLLGPL	9	0.1637	0.1053	0.2737	0.6023	0.7064	0.1067	0.1566
ITSGFLGPL	9	0.2968	0.213	0.4773	0.4386	0.5801	0.1182	0.174
PQSLDSWLT	9	0.0136	0.0158	0.023	0.0057	0.0107	0.0174	0.0186
QSPTSNHSL	9	0.0932	0.0487	0.1217	0.2188	0.2189	0.0981	0.1131
SAISSTFSK	9	0.4153	0.7515	0.1406	0.0816	0.3035	0.0742	0.1272
STISSTFSK	9	0.5266	0.8181	0.1816	0.0487	0.199	0.0767	0.1426
TASPISSIF	9	0.2336	0.2347	0.1703	0.5423	0.835	0.1607	0.2816
TASPLSSIF	9	0.199	0.182	0.1302	0.4996	0.8135	0.1518	0.2641
TCIPIPSSW	9	0.0759	0.072	0.0553	0.0829	0.3172	0.0423	0.0861
TIPQSLDSW	9	0.1047	0.0755	0.052	0.047	0.1425	0.0447	0.0878
TVSAISSTF	9	0.3865	0.3438	0.2688	0.3215	0.7175	0.1243	0.2452
LLGPLLVLL	9	0.0628	0.0536	0.1751	0.1023	0.1841	0.1082	0.153
ILNPFLPLL	9	0.1053	0.0747	0.3031	0.278	0.4287	0.2168	0.3034
AFGKFLWEWA	10	0.0331	0.0463	0.0671	0.0091	0.0195	0.0338	0.0571
AILSKTGDPV	10	0.0816	0.0482	0.2278	0.0424	0.0852	0.0497	0.0602
EWASARFSWL	10	0.165	0.1167	0.1853	0.074	0.1448	0.0913	0.1426
FFLLTRILTI	10	0.0611	0.0513	0.1889	0.0922	0.2077	0.1005	0.1729
FILLLCLIFL	10	0.0442	0.0592	0.1417	0.0597	0.1153	0.0549	0.0707
GLSPTVWLSV	10	0.0734	0.054	0.2311	0.0487	0.0873	0.0762	0.1001
HQLDPAFGAN	10	0.0449	0.0352	0.0409	0.0148	0.051	0.0329	0.0522
ILLLCLIFLL	10	0.0276	0.0569	0.1184	0.0229	0.0461	0.0563	0.0669
ITSGFLGPLL	10	0.1833	0.1342	0.3297	0.1669	0.2942	0.0907	0.1325
LLDYQGMLPV	10	0.1046	0.0638	0.3127	0.087	0.1917	0.138	0.152
LLLCLIFLLV	10	0.0341	0.0596	0.1618	0.017	0.04	0.05	0.0573
LLPIFFCLWV	10	0.0581	0.0775	0.2283	0.0296	0.064	0.0621	0.087
LLVLQAGFFL	10	0.0802	0.087	0.2532	0.0736	0.1428	0.0695	0.0976
LLVPFVQWFV	10	0.132	0.1916	0.5159	0.0506	0.1216	0.0796	0.1178
LPLLPIFFCL	10	0.0562	0.0743	0.1981	0.0592	0.0963	0.0812	0.0942
LSPFLPLLPI	10	0.1276	0.1029	0.3694	0.1876	0.3097	0.0935	0.1319
LSPTVWLSVI	10	0.0868	0.0557	0.1837	0.1241	0.2051	0.0824	0.1126
LVLLDYQGML	10	0.0815	0.0461	0.1485	0.0818	0.1479	0.0615	0.0766
LVLQAGFFLL	10	0.0936	0.116	0.3158	0.0879	0.178	0.0799	0.1068
MGTNLSVPNP	10	0.0449	0.0624	0.0935	0.0214	0.0435	0.0232	0.0309
MMWYWGPSLY	10	0.3215	0.472	0.1574	0.1261	0.6497	0.1429	0.4516
PLGFFPDHQL	10	0.0321	0.0369	0.077	0.0365	0.0621	0.0371	0.0395
QWFVGLSPTV	10	0.0725	0.0697	0.1931	0.032	0.0832	0.0796	0.121
RWMCLRRFII	10	0.054	0.0614	0.1017	0.0306	0.0695	0.1304	0.184
SARFSWLSLL	10	0.2278	0.1535	0.37	0.2716	0.4606	0.1191	0.1932
SIVSPFIPLL	10	0.2586	0.1628	0.5098	0.2105	0.3229	0.0836	0.1242
SLNFLGGTTV	10	0.1035	0.0666	0.2673	0.0877	0.1644	0.0819	0.1035
SMYPSCCCTK	10	0.2068	0.4121	0.0674	0.0252	0.1248	0.0889	0.1732
TTASPISSIF	10	0.3869	0.277	0.2776	0.218	0.5666	0.0967	0.1828
WMMWYWGPSL	10	0.1603	0.0895	0.3537	0.2821	0.4622	0.1718	0.2326
WYWGPSLYNI	10	0.0715	0.0858	0.2583	0.0701	0.1557	0.1487	0.2654
WYWGPSLYSI	10	0.0771	0.0871	0.2733	0.0958	0.1911	0.1581	0.2823
YSILSPFLPL	10	0.2688	0.1886	0.5288	0.647	0.7361	0.1325	0.2036
LLCLIFLLVL	10	0.032	0.0463	0.0672	0.0363	0.0726	0.0408	0.0522
FIIFLFILLL	10	0.1177	0.1304	0.243	0.1041	0.2062	0.0485	0.081
FLFILLLCLI	10	0.0516	0.0611	0.1499	0.043	0.0987	0.0541	0.0884
FLGPLLVLQA	10	0.0565	0.0549	0.1509	0.0313	0.0698	0.0495	0.0686
FVGLSPTVWL	10	0.1343	0.0921	0.4381	0.2376	0.3368	0.1008	0.1345
LLVLLDYQGM	10	0.0837	0.0748	0.0989	0.0495	0.1497	0.0403	0.0629
SILSPFLPLL	10	0.1693	0.1121	0.4142	0.1798	0.2901	0.105	0.1489
SLYSILSPFL	10	0.1886	0.1213	0.3535	0.1279	0.2602	0.1268	0.208
VLQAGFFLLT	10	0.0582	0.0696	0.1208	0.0203	0.0571	0.0539	0.0641
YQGMLPVCPL	10	0.1355	0.0833	0.2477	0.3488	0.4755	0.144	0.1846
PTPFSPPLRD	10	0.0268	0.0685	0.0153	0.0039	0.0106	0.0155	0.02
STGPCKTCTT	10	0.0793	0.0608	0.1017	0.0218	0.0433	0.0331	0.0412
ASPISSIFSR	10	0.232	0.614	0.0723	0.0149	0.0627	0.0404	0.0814
PFMPLLPIFF	10	0.0548	0.0682	0.046	0.0438	0.1469	0.088	0.1756
TSCPPICPGY	10	0.2005	0.2792	0.0818	0.0433	0.3506	0.0501	0.1522
TSTTSMGPCK	10	0.2147	0.4844	0.0509	0.0165	0.0591	0.0322	0.0576
VIWMMWYWGR	10	0.1119	0.4678	0.069	0.0056	0.023	0.0287	0.068
VWLSVIWMMW	10	0.0366	0.0716	0.0367	0.0128	0.0426	0.0442	0.1012
WLSVIWMMWY	10	0.1124	0.1662	0.0424	0.0193	0.1826	0.0352	0.119
STTSGFLGPL	10	0.3103	0.1976	0.4553	0.2286	0.3383	0.0884	0.1161
SVIWMMWYWG	10	0.0851	0.1465	0.136	0.0142	0.0443	0.0224	0.035
LLGPLLVLQA	10	0.0412	0.0448	0.1042	0.0168	0.0366	0.0348	0.0466
SVISMMWYWG	10	0.1262	0.1704	0.1623	0.0182	0.0655	0.0267	0.0454
SVMWMMWYWG	10	0.0869	0.1598	0.1635	0.0172	0.0545	0.0295	0.0457
FGANSNNPDW	10	0.0525	0.0636	0.0373	0.0926	0.3146	0.0593	0.1094
NILSPFIPLL	10	0.1729	0.1322	0.4961	0.118	0.2105	0.0942	0.1317
NILSPFLPLL	10	0.167	0.1193	0.4547	0.1307	0.2368	0.0974	0.1316
NILSPFMPLL	10	0.1957	0.1433	0.5059	0.1383	0.2497	0.1016	0.1373
SILSPFIPLL	10	0.1755	0.1201	0.4473	0.1613	0.2648	0.1021	0.1472
CPGYRWMCLR	10	0.1472	0.419	0.0729	0.0095	0.0408	0.0448	0.0815
LQAGFFSLTK	10	0.2009	0.4507	0.0654	0.0249	0.1223	0.0654	0.1102
KPRKGMGTNL	10	0.0542	0.0223	0.0403	0.0575	0.0741	0.0856	0.1117
LQDPRVRALY	10	0.0932	0.1084	0.0328	0.0557	0.3237	0.1089	0.2607
LTIPQSLDSW	10	0.1241	0.1083	0.0661	0.0633	0.2942	0.0424	0.0951
NITSGFLGPL	10	0.2913	0.2004	0.4658	0.1303	0.2266	0.0824	0.1049
TRILTIPQSL	10	0.0789	0.0446	0.1557	0.0793	0.1496	0.0628	0.1026
CIPIPSSWAF	10	0.1827	0.1747	0.149	0.1194	0.3694	0.1133	0.1982
AFGPGFTPPHG	11	0.02	0.0178	0.0147	0.0062	0.0183	0.0183	0.0361
ASARFSWLSLL	11	0.1122	0.0741	0.166	0.1022	0.2005	0.0725	0.111
ASPLSSIFSRI	11	0.0629	0.133	0.1172	0.0505	0.078	0.0482	0.0592
GFFLLTRILTI	11	0.027	0.0221	0.063	0.0215	0.0605	0.043	0.0697
GFFPDHQLDPA	11	0.0346	0.0326	0.0571	0.0181	0.0411	0.0419	0.0622
GWSPQAQGVLT	11	0.02	0.0158	0.0216	0.0104	0.0177	0.0367	0.0445
LYSILSPFLPL	11	0.0877	0.064	0.1978	0.2384	0.3645	0.0879	0.1647
RFSWLSLLVPF	11	0.0514	0.0654	0.0509	0.061	0.2465	0.0871	0.189
WASARFSWLSL	11	0.1	0.0652	0.1559	0.2819	0.4205	0.0868	0.1278
WMMWYWGPSLY	11	0.1618	0.2092	0.0775	0.0762	0.4124	0.0915	0.2955
TTSGFLGPLLV	11	0.1709	0.138	0.5401	0.0598	0.1322	0.0534	0.0784
LTTVPAASLLA	11	0.0753	0.0622	0.1528	0.0406	0.0872	0.0437	0.0568
TSMFPSCCCTK	11	0.2209	0.499	0.075	0.025	0.0951	0.0547	0.1123
TTSTGPCKTCT	11	0.0289	0.0285	0.033	0.0073	0.0193	0.0139	0.0184
VWLSVIWMMWF	11	0.0246	0.0296	0.0194	0.0187	0.0832	0.0428	0.084
ENITSGFLGPL	11	0.2723	0.1475	0.4056	0.0456	0.0807	0.0444	0.0534
FSLTKILTIPQ	11	0.0652	0.1235	0.0459	0.0322	0.1102	0.028	0.0369
LTIPQSLDSWW	11	0.0734	0.062	0.0438	0.0319	0.1429	0.0396	0.0752
LTRILTIPQSL	11	0.0649	0.0444	0.1154	0.0812	0.1796	0.0467	0.0727
IPQSLDSWWTSL	12	0.0405	0.0317	0.075	0.0663	0.1021	0.1256	0.1186
IPQSLHSWWTSL	12	0.054	0.0338	0.0768	0.0617	0.1207	0.098	0.1001
KYLWEWASVRFS	12	0.0274	0.0509	0.0316	0.0109	0.0369	0.0438	0.086
PLGFFPDHQLDP	12	0.0103	0.0131	0.0122	0.0035	0.007	0.0156	0.0162
RVRGLYLPAGGS	12	0.0431	0.0328	0.0403	0.0114	0.0383	0.0271	0.0441
TGPCKTCTIPAQ	12	0.0226	0.0259	0.019	0.0058	0.0158	0.0187	0.0234
TGPCKTCTTPAQ	12	0.0215	0.0248	0.0162	0.0055	0.0165	0.0168	0.024
TGPCKTCTTTAQ	12	0.0222	0.0261	0.0137	0.0048	0.0171	0.0166	0.0227
TGPCRTCTIPAQ	12	0.0249	0.0277	0.0199	0.0065	0.0178	0.021	0.0276
TGPCRTCTTLAQ	12	0.0257	0.029	0.0185	0.0083	0.0207	0.0281	0.033
TGPCRTCTTPAQ	12	0.0237	0.0266	0.0168	0.0061	0.0181	0.0186	0.0271
TGPCRTCTTTAQ	12	0.0244	0.0287	0.0142	0.0054	0.0185	0.018	0.0262
TRILTIPQSLDS	12	0.0356	0.0293	0.0302	0.0099	0.024	0.0243	0.0325
TSLNFLGGSPVC	12	0.0542	0.0434	0.147	0.0372	0.0786	0.0374	0.0495
WEWASVRFSWLS	12	0.0462	0.0742	0.063	0.0149	0.04	0.0449	0.0561
NSMFPSCCCTKP	12	0.0796	0.221	0.0735	0.0172	0.0383	0.0351	0.0551
GFFLLTRILTIP	12	0.0166	0.0169	0.0266	0.0066	0.0185	0.0247	0.0339
VGLSPTVWLSVI	12	0.0319	0.0258	0.0734	0.0462	0.0723	0.0479	0.0589
QDSRVRALYLPA	12	0.0604	0.0499	0.0666	0.0133	0.039	0.0306	0.0443
LSTSNPLGFFPD	12	0.0345	0.0375	0.027	0.0132	0.0611	0.029	0.0505
FSLTKILTIPQS	12	0.0463	0.05	0.0755	0.0303	0.085	0.0282	0.0383
IASGLLGPLLVL	12	0.058	0.0343	0.1011	0.2423	0.3471	0.06	0.0835
KILTIPQSLDSW	12	0.035	0.0321	0.0228	0.0146	0.0698	0.0239	0.0553
MENIASGLLGPL	12	0.1309	0.0935	0.1921	0.1518	0.28	0.067	0.0886
MENITSGFLGPL	12	0.2239	0.18	0.3516	0.0891	0.2097	0.071	0.0976
WTSLNFLGGTTV	12	0.1187	0.082	0.388	0.0826	0.1867	0.061	0.0836

## Sheet: C
(C) NetMHCIIpan-4.3 and MHCflurry prediction results for HBsAg epitopes with BA score>0.25 for HLA-A*68:01
Peptide	Length	HLA-A*66:01		HLA-A*68:01
		netMHCpan:BA-score	mhcflurry:affinity	netMHCpan:BA-score	mhcflurry:affinity
LVPFVQWFV	9	0.2056	9229.01	0.2793	7236.01
GGSYFMISR	9	0.111	1861.97	0.4465	309.04
QAGFFLLTK	9	0.1624	581.16	0.4496	64.32
STISSILSK	9	0.5154	57.6	0.7266	26.22
STTSMGPCK	9	0.251	375.03	0.5342	56.68
STTSTGPCK	9	0.2491	352.06	0.5082	66.75
TTSGFLGPL	9	0.4609	340.55	0.3395	1173.06
YLWEWASVR	9	0.2359	367.16	0.5268	89.95
FLWEWASVR	9	0.235	225.81	0.5185	72.16
QAGFFLLTR	9	0.1843	57.95	0.5941	29.36
QAGFFSLTK	9	0.1665	667.49	0.4949	65.5
SAISSISSK	9	0.4861	59.25	0.6903	34.24
SPISSIFSR	9	0.2787	81.37	0.5672	50.23
SAISSTFSK	9	0.4153	102.32	0.7515	28.7
STISSTFSK	9	0.5266	67.19	0.8181	23.76
TVSAISSTF	9	0.3865	274.94	0.3438	1369.02
MMWYWGPSLY	10	0.3215	11020.7	0.472	5433.49
SMYPSCCCTK	10	0.2068	381.82	0.4121	85.49
TTASPISSIF	10	0.3869	665.91	0.277	1492.39
ASPISSIFSR	10	0.232	419.29	0.614	87.82
TSCPPICPGY	10	0.2005	911.03	0.2792	902.66
TSTTSMGPCK	10	0.2147	3902.38	0.4844	322.13
VIWMMWYWGR	10	0.1119	8608.5	0.4678	1341.66
CPGYRWMCLR	10	0.1472	16980.7	0.419	7798.83
LQAGFFSLTK	10	0.2009	8039.15	0.4507	697.01
TSMFPSCCCTK	11	0.2209	607.24	0.499	104.16

## Sheet: D
(D) NetMHCIIpan-4.3 and MHCflurry prediction results for HBsAg epitopes with BA score>0.25 for HLA-A*69:01
Peptide	Length	HLA-A*66:01		HLA-A*69:01
		netMHCpan:BA-score	mhcflurry:affinity	netMHCpan:BA-score	mhcflurry:affinity
FLLTKILTI	9	0.0801	15849.3	0.309	1471.15
FLLTRILTI	9	0.087	15754.5	0.3088	1963.26
FLLTRILTL	9	0.105	10979.5	0.2754	2352.82
FTPPHGGLL	9	0.3051	177.38	0.344	202.12
ILSPFLPLL	9	0.1121	10527.9	0.3196	1069.14
IVSPFIPLL	9	0.2073	631.5	0.5349	138.68
LLPFVQWFV	9	0.1301	19059.1	0.574	522.28
LVLQAGFFL	9	0.1043	11338.7	0.4254	1597.94
LVPFVQWFV	9	0.2056	9229.01	0.6998	129.26
MMWYWGPSL	9	0.152	18835.7	0.5204	3576.19
SLDSWWTSV	9	0.0857	18786.2	0.3485	3168.12
SSWAFARFL	9	0.1724	12983.5	0.4344	4666.27
VLQAGFFLL	9	0.0731	18602.6	0.2664	5863.69
WLSLLVPFV	9	0.0952	19282.7	0.4692	576.27
YLLTRILTI	9	0.0954	17155	0.3212	2680.74
ILSPFMPLL	9	0.1302	11854.3	0.3457	1663.19
FIIFLFILL	9	0.1554	4481.54	0.3961	505.17
SILSPFLPL	9	0.2273	2393.5	0.5542	761.75
MMWFWGPSL	9	0.1456	17202.4	0.5227	2328.19
TTSGFLGPL	9	0.4609	340.55	0.6665	160.92
WLSLLVQFV	9	0.0918	20392.1	0.3926	948.18
NLLGWSPQA	9	0.086	20447.9	0.3245	3556.31
ILSPFIPLL	9	0.1227	9277.23	0.3703	993.5
TLSPFLPLL	9	0.1745	7890.32	0.4958	550.56
IASGLLGPL	9	0.1637	1907.28	0.2737	1584.54
ITSGFLGPL	9	0.2968	744.81	0.4773	348.02
TVSAISSTF	9	0.3865	274.94	0.2688	9355.21
ILNPFLPLL	9	0.1053	10954.3	0.3031	2171.53
ITSGFLGPLL	10	0.1833	2267.61	0.3297	1146.15
LLDYQGMLPV	10	0.1046	31011.8	0.3127	18994
LLVLQAGFFL	10	0.0802	27250.1	0.2532	18106.9
LLVPFVQWFV	10	0.132	20358.7	0.5159	1486.98
LSPFLPLLPI	10	0.1276	26553.7	0.3694	13958.4
LVLQAGFFLL	10	0.0936	18781.4	0.3158	8683.97
SARFSWLSLL	10	0.2278	23486.3	0.37	23039.2
SIVSPFIPLL	10	0.2586	4973.89	0.5098	4762.62
SLNFLGGTTV	10	0.1035	23553.5	0.2673	10195.5
TTASPISSIF	10	0.3869	665.91	0.2776	8591.72
WMMWYWGPSL	10	0.1603	21595.8	0.3537	6633.7
WYWGPSLYNI	10	0.0715	30555.6	0.2583	22158
WYWGPSLYSI	10	0.0771	30246.7	0.2733	21749.2
YSILSPFLPL	10	0.2688	21860	0.5288	12570.9
FVGLSPTVWL	10	0.1343	20153	0.4381	14334.3
SILSPFLPLL	10	0.1693	10971.9	0.4142	5617.33
SLYSILSPFL	10	0.1886	16276	0.3535	4483.01
STTSGFLGPL	10	0.3103	2224.87	0.4553	1841.9
NILSPFIPLL	10	0.1729	11374.1	0.4961	6894.28
NILSPFLPLL	10	0.167	11478.8	0.4547	5815.62
NILSPFMPLL	10	0.1957	13575.4	0.5059	8122.22
SILSPFIPLL	10	0.1755	10904	0.4473	6492.63
NITSGFLGPL	10	0.2913	10297.3	0.4658	11014.2
TTSGFLGPLLV	11	0.1709	22474	0.5401	11654.4
ENITSGFLGPL	11	0.2723	22671.9	0.4056	25341.1
MENITSGFLGPL	12	0.2239	31949	0.3516	30986.6
WTSLNFLGGTTV	12	0.1187	30941.5	0.388	26444

## Sheet: E
(E) NetMHCIIpan-4.3 and MHCflurry prediction results for HBsAg epitopes with BA score>0.25 for HLA-C*04:313
Peptide	Length	HLA-C*04:01		HLA-C*04:313
		netMHCpan:BA-score	mhcflurry:affinity	netMHCpan:BA-score	mhcflurry:affinity
LQDPRVRAL	9	0.2049	40.77	0.2593	51.89
FTPPHGGLL	9	0.291	53.26	0.377	65.97
SLDSWWTSL	9	0.2693	43.21	0.2932	86.3
LYNILSPFL	9	0.1681	233.91	0.3419	148.77
FMPLLPIFF	9	0.1563	432.7	0.3026	159.37
ILNPFLPLL	9	0.2168	230.26	0.3034	203.89
LWEWASVRF	9	0.274	342.27	0.4276	206.03
TASPISSIF	9	0.1607	1187.95	0.2816	224.27
LYSILSPFL	9	0.1601	494.45	0.321	246.84
FLLTRILTL	9	0.2185	503.68	0.3075	250.56
ILSPFIPLL	9	0.2201	305.49	0.3086	273.19
TASPLSSIF	9	0.1518	1932.07	0.2641	277.77
LQDPRVRALY	10	0.1089	6466.32	0.2607	364.75
SWWTSLNFL	9	0.2045	492.44	0.2969	374.19
FWGPSLYNI	9	0.1635	549.88	0.2509	414.3
ILSPFLPLL	9	0.21	476.6	0.2912	429.93
AMQWNSTTF	9	0.1418	5242.46	0.2629	499.36
TLSPFLPLL	9	0.1754	568.88	0.2611	542.55
ILSPFMPLL	9	0.2099	816.29	0.297	765.58
YLLTRILTI	9	0.1843	1564.67	0.2535	800.14
SWLSLLVPF	9	0.142	5386.03	0.2612	888.32
MMWFWGPSL	9	0.2191	2292.87	0.3052	2126.92
RFSWLSLLV	9	0.1775	4014.98	0.3117	2505.59
MMWYWGPSL	9	0.2303	3519.07	0.3331	2868.34
MMWYWGPSLY	10	0.1429	25374.3	0.4516	3729.03
WYWGPSLYSI	10	0.1581	6545.4	0.2823	4913.4
SSWAFARFL	9	0.1489	10680.8	0.2505	6552.5
WYWGPSLYNI	10	0.1487	8220.4	0.2654	7248.07
RWMCLRRFI	9	0.1782	15264	0.2807	10793.7
WMMWYWGPSLY	11	0.0915	31330.8	0.2955	21817.6

## Sheet: F
(F) NetMHCIIpan-4.3 and MHCflurry prediction results for HBsAg epitopes with BA score>0.25 for HLA-C*03:40
Peptide	Length	HLA-C*03:26		HLA-C*03:40
		netMHCpan:BA-score	mhcflurry:affinity	netMHCpan:BA-score	mhcflurry:affinity
LYNILSPF	8	0.0495	18605.1	0.2518	5045.83
SLYSILSPFL	10	0.1279	7237.18	0.2602	8339.74
SWLSLLVPF	9	0.0708	14432.1	0.2617	2983.64
SILSPFIPLL	10	0.1613	2537.3	0.2648	5704.57
VLQAGFFIL	9	0.1597	1219.55	0.2703	3757.3
WASVRFSW	8	0.0582	20689.8	0.2742	10975
NSNNPDWDF	9	0.0809	3862.94	0.2772	1295.12
MENIASGLLGPL	12	0.1518	19919.6	0.28	19386.2
SLDSWWTSL	9	0.2313	90.71	0.2858	591.24
SILSPFLPLL	10	0.1798	2726.54	0.2901	6033.24
ILSPFLPL	8	0.1894	503.1	0.2931	682.45
ITSGFLGPLL	10	0.1669	199.68	0.2942	523.65
LTIPQSLDSW	10	0.0633	6257.44	0.2942	1898.29
SAISSTFSK	9	0.0816	2045.35	0.3035	487.53
IIFLFILLL	9	0.1797	365.83	0.3046	455.37
FLGGTRVCL	9	0.2118	132.69	0.3087	284.47
LSPFLPLLPI	10	0.1876	5994.75	0.3097	10963.1
FGANSNNPDW	10	0.0926	11245.7	0.3146	5672.46
TCIPIPSSW	9	0.0829	2132.72	0.3172	703
SIVSPFIPLL	10	0.2105	872.72	0.3229	2593.01
LQDPRVRALY	10	0.0557	11932.5	0.3237	849.44
ILRSFIPLL	9	0.1593	598.37	0.331	491.15
SAISSISSK	9	0.0827	618.03	0.3341	182.21
FVGLSPTVWL	10	0.2376	3514.36	0.3368	8192.14
STTSGFLGPL	10	0.2286	1668.52	0.3383	2709.02
FLFILLLCL	9	0.1923	391.43	0.3416	470.54
IASGLLGPLLVL	12	0.2423	1918.29	0.3471	3634.99
TSCPPICPGY	10	0.0433	1398.8	0.3506	133.18
FLGGTPVCL	9	0.2591	68.53	0.355	150.16
FLGGPPVCL	9	0.2886	45.73	0.3567	84.87
TLSPFLPLL	9	0.2408	86.45	0.3624	235.44
LYSILSPFLPL	11	0.2384	23932.4	0.3645	25542.4
CIPIPSSWAF	10	0.1194	2408.71	0.3694	1043.54
LVLQAGFFL	9	0.237	683.93	0.3764	1887.28
FLGGTTVCL	9	0.2745	80.49	0.3788	180.97
FIIFLFILL	9	0.2401	252.76	0.3862	447.62
WMMWYWGPSLY	11	0.0762	30975.5	0.4124	18203
WASARFSWLSL	11	0.2819	4437.69	0.4205	11053.8
ILSPFLPLL	9	0.2862	69.49	0.4215	130.17
ILNPFLPLL	9	0.278	60.93	0.4287	107.68
FVGLSPTVW	9	0.1441	1057.76	0.4431	278.51
ILSPFMPLL	9	0.3083	94.58	0.4532	188.06
SARFSWLSLL	10	0.2716	9941.28	0.4606	9129.47
FLLTKILTI	9	0.2838	139.36	0.4607	209.59
WMMWYWGPSL	10	0.2821	12100.5	0.4622	14943.1
ILSPFIPLL	9	0.3128	54.29	0.4626	91.16
LQDPRVRAL	9	0.3763	48.68	0.47	84.64
YQGMLPVCPL	10	0.3488	10663.6	0.4755	13975.9
FMPLLPIFF	9	0.2	259.56	0.479	105.78
FLLTRILTI	9	0.297	153.3	0.4836	195.38
YLLTRILTI	9	0.3002	191.2	0.4837	228.83
TTSGFLGPL	9	0.3817	114.49	0.4991	184.96
IPIPSSWAF	9	0.2506	775.16	0.5341	424.58
FTPPHGGLL	9	0.4893	28.86	0.5403	45.77
AMQWNSTTF	9	0.2642	964.75	0.5562	130.89
SSWAFARFL	9	0.4004	163.02	0.5648	206.08
TTASPISSIF	10	0.218	359.7	0.5666	115.61
IVSPFIPLL	9	0.4133	33.47	0.5766	51.68
ITSGFLGPL	9	0.4386	77.28	0.5801	131.15
SILSPFLPL	9	0.4962	46.89	0.5956	62.41
FLLTRILTL	9	0.4652	61.54	0.6273	70.54
MMWYWGPSLY	10	0.1261	16809.9	0.6497	465.58
MMWFWGPSL	9	0.4264	249.04	0.6608	318.69
MMWYWGPSL	9	0.463	362.9	0.6817	426.94
IASGLLGPL	9	0.6023	36.54	0.7064	56.38
TVSAISSTF	9	0.3215	101.48	0.7175	62.17
YSILSPFLPL	10	0.647	181.23	0.7361	304.81
LSVPNPLGF	9	0.4602	60.96	0.7999	44.75
TASPLSSIF	9	0.4996	48.66	0.8135	42.46
TASPISSIF	9	0.5423	42.86	0.835	39.57

## Sheet: G
(G) Binding prediction results of known HBsAg epitopes to (DQA1*01:01 or *01:02) - (DQB1*02:01, *05:01, *05:02, *06:01, *06:02 or *06:04) by NetMHCIIpan-4.3
Peptide	Length	BA-score
		HLA-DQA10101-DQB10201	HLA-DQA10102-DQB10201	HLA-DQA10101-DQB10501	HLA-DQA10102-DQB10501	HLA-DQA10101-DQB10502	HLA-DQA10102-DQB10502	HLA-DQA10101-DQB10601	HLA-DQA10102-DQB10601	HLA-DQA10101-DQB10602	HLA-DQA10102-DQB10602	HLA-DQA10101-DQB10604	HLA-DQA10102-DQB10604
AGAFGLGFTPPHGGL	15	0.095202	0.106109	0.182132	0.355152	0.112765	0.196157	0.205756	0.286271	0.110524	0.193578	0.129274	0.198793
AGFFLLTRILTIPQS	15	0.23923	0.324826	0.387951	0.698659	0.14383	0.294295	0.300122	0.378457	0.245289	0.420378	0.244416	0.376187
ANPPPASTNRQSGRQ	15	0.015487	0.024285	0.010527	0.051573	0.010001	0.017693	0.073399	0.141073	0.040619	0.10234	0.017245	0.031291
ANTANPDWDFNPNKD	15	0.078528	0.107763	0.130995	0.164534	0.084022	0.127029	0.119621	0.142368	0.075678	0.091486	0.152769	0.218943
AQGILQTLPANPPPA	15	0.150262	0.227479	0.169513	0.561723	0.085005	0.232617	0.22661	0.349114	0.178424	0.361891	0.161486	0.316262
DWDFNPNKDTWPDAN	15	0.055898	0.089415	0.086223	0.148924	0.05613	0.09556	0.119483	0.143219	0.067149	0.096819	0.095196	0.153294
FDIAHISSSSARTGA	15	0.098575	0.163745	0.094727	0.575437	0.059958	0.144271	0.296152	0.492335	0.199834	0.506926	0.153134	0.300309
FFLLTRILTIPQSLD	15	0.243196	0.35507	0.3247	0.7029	0.133505	0.30496	0.278241	0.371699	0.238478	0.436033	0.247137	0.385398
FFPDHQLDPAFRANT	15	0.140498	0.194897	0.19255	0.322811	0.112166	0.194818	0.215575	0.270358	0.143833	0.208697	0.145358	0.213527
FLPLLPIFFCLWVYI	15	0.128848	0.162924	0.168369	0.30446	0.074107	0.130522	0.096818	0.126502	0.083729	0.114634	0.13648	0.175408
GFTPPHGGLLGWSPQ	15	0.058225	0.089151	0.059774	0.130665	0.051362	0.080715	0.232652	0.336893	0.15306	0.258818	0.089262	0.147581
GGLLGWSPQAQGILQ	15	0.150303	0.201597	0.390536	0.470221	0.286523	0.422532	0.323103	0.435212	0.23424	0.348279	0.208741	0.277743
GLSPTVWLSAIWMMW	15	0.170276	0.231402	0.198489	0.380368	0.096519	0.159355	0.272782	0.385448	0.211904	0.377175	0.195391	0.301684
GLYFPAGGSSSGTVN	15	0.044557	0.057385	0.036285	0.145445	0.028818	0.046624	0.150006	0.263801	0.071139	0.156766	0.068552	0.122844
GYRWMCLRRFIIFLF	15	0.172065	0.211299	0.271334	0.373979	0.1511	0.206881	0.207151	0.239576	0.160737	0.186279	0.171195	0.216354
HQLDPAFGANSTNPD	15	0.085351	0.129144	0.095872	0.29314	0.056498	0.117528	0.20256	0.318518	0.119519	0.250774	0.136081	0.228512
ILQTLPANPPPASTN	15	0.102351	0.152299	0.119302	0.460877	0.057095	0.16204	0.167688	0.277478	0.117198	0.252844	0.112691	0.244186
LDPAFRANTANPDWD	15	0.132514	0.215933	0.203473	0.373053	0.109605	0.257801	0.207651	0.272394	0.144934	0.232242	0.179917	0.273609
LLGWSPQAQGILETL	15	0.155117	0.206605	0.305719	0.402028	0.222661	0.333362	0.303766	0.410356	0.222315	0.317576	0.2107	0.285453
LLTRILTIPQSLDSW	15	0.197629	0.311909	0.220468	0.630604	0.112314	0.270497	0.208409	0.315276	0.169629	0.355866	0.186039	0.313937
LQDPRVRGLYFPAGG	15	0.094854	0.147894	0.160808	0.413178	0.106723	0.17376	0.193887	0.292969	0.129377	0.241126	0.121706	0.198554
LVLLDYQGMLPVCPL	15	0.238779	0.324695	0.397275	0.591117	0.195006	0.344631	0.28316	0.355799	0.217266	0.308594	0.28319	0.403841
LVPFVQWFVGLSPTV	15	0.198433	0.261959	0.469282	0.576204	0.286817	0.403919	0.29294	0.330496	0.246082	0.320985	0.219957	0.313731
MENITSGFLGPLLVL	15	0.161199	0.205342	0.434089	0.553977	0.200465	0.361705	0.348729	0.452633	0.226551	0.326031	0.271853	0.384809
MGQNLSTSNPLGFFP	15	0.108893	0.172881	0.131862	0.467945	0.054919	0.152429	0.232617	0.371101	0.17147	0.338207	0.176063	0.318056
MQWNSTAFHQTLQDP	15	0.145872	0.200367	0.201945	0.366778	0.13635	0.223179	0.303156	0.363805	0.240939	0.348118	0.18611	0.244627
NIASHISSSSARTGD	15	0.084882	0.124284	0.109607	0.489532	0.066001	0.164638	0.294311	0.507347	0.209653	0.538732	0.119308	0.243108
NKDTWPDANKVGAGA	15	0.044796	0.064705	0.073508	0.116447	0.049137	0.092756	0.123886	0.178992	0.071479	0.1257	0.049847	0.07826
PLGFFPDHQLDPAFG	15	0.244009	0.29188	0.674891	0.601515	0.442721	0.579803	0.229509	0.235192	0.191014	0.186248	0.2857	0.374963
PLLVLQAGFFLLTRI	15	0.209426	0.267052	0.417728	0.484054	0.254358	0.353671	0.326873	0.397632	0.256096	0.292973	0.22159	0.257883
PSSWAFGKFLWEWAS	15	0.165541	0.192341	0.271767	0.301149	0.194985	0.261021	0.320437	0.336982	0.212967	0.230352	0.192538	0.226727
SLNFLGGTTVCLGQN	15	0.133987	0.193662	0.183145	0.494585	0.097998	0.188667	0.314682	0.468336	0.235181	0.48363	0.21494	0.34893
SPTSCPPTCPGYRWM	15	0.029558	0.042952	0.024051	0.060646	0.014763	0.025392	0.061242	0.098527	0.038975	0.063488	0.035756	0.061945
STNRQSGRQPTPLSP	15	0.038629	0.054301	0.043432	0.120039	0.022585	0.044412	0.118724	0.179884	0.060162	0.111748	0.043776	0.073467
SVRFSWLSLLVPFVQ	15	0.27555	0.365978	0.445018	0.592046	0.248469	0.3491	0.373906	0.434347	0.297559	0.393731	0.35852	0.447075
TDGNCTCIPIPSSWA	15	0.078121	0.119624	0.114317	0.387973	0.076788	0.158825	0.217811	0.364561	0.182679	0.389531	0.158801	0.287696
TIPQSLDSWWTSLNF	15	0.130285	0.17662	0.346227	0.397218	0.233933	0.278087	0.207389	0.262664	0.135005	0.201443	0.190951	0.255898
TSLNFLGGSPVCLGQ	15	0.148064	0.200648	0.190747	0.516419	0.112759	0.185461	0.296651	0.440114	0.177348	0.339988	0.2083	0.321564
TSNPLGFFPDHQLDP	15	0.260836	0.313102	0.700774	0.624142	0.480155	0.61313	0.247823	0.232837	0.203864	0.191666	0.316377	0.394817
TTFHQTLQDPRVRGL	15	0.116794	0.169696	0.165159	0.302352	0.09813	0.181418	0.151565	0.229109	0.106833	0.175839	0.15996	0.218829
TTSTGPCKTCTTPAQ	15	0.032736	0.057975	0.03616	0.179284	0.024059	0.049745	0.093323	0.185005	0.073784	0.162772	0.063081	0.150301
TVNPVLTTASPLSSI	15	0.133245	0.231401	0.128662	0.619123	0.05611	0.16401	0.311265	0.497331	0.215356	0.484652	0.202892	0.376396
VPFVQWFVGLSPTVW	15	0.232606	0.295067	0.465903	0.574797	0.277536	0.403506	0.301988	0.351933	0.245094	0.329292	0.238926	0.341356
WASVRFSWLSLLVPF	15	0.273773	0.355786	0.473301	0.567036	0.25937	0.354519	0.393357	0.432594	0.3167	0.398992	0.349354	0.43045
YFPAGGSSSGTLNPV	15	0.049554	0.072576	0.049711	0.191324	0.023748	0.045532	0.191806	0.312104	0.105553	0.200083	0.097947	0.165221
AFRANTANPDWDFNP	15	0.140771	0.218275	0.253468	0.421717	0.123074	0.284759	0.193038	0.251078	0.145612	0.210698	0.23954	0.355743
DHQLDPAFRANTANP	15	0.084501	0.120407	0.102059	0.26348	0.069269	0.126212	0.224048	0.308411	0.152804	0.217125	0.109977	0.162298
FNPNKDTWPDANKVG	15	0.054373	0.082902	0.097404	0.137276	0.064083	0.123446	0.126187	0.162304	0.083654	0.116334	0.074492	0.120388
GRQPTPLSPPLRNTH	15	0.044395	0.074116	0.02715	0.131749	0.018686	0.039243	0.09204	0.169581	0.051595	0.111645	0.044035	0.083974
ILETLPANPPPASTN	15	0.088714	0.137937	0.107687	0.406251	0.055403	0.14365	0.148693	0.254675	0.106712	0.229816	0.102759	0.23103
LSPPLRNTHPQAMQW	15	0.121486	0.190765	0.139565	0.438017	0.066749	0.152224	0.227742	0.347997	0.17131	0.335814	0.1452	0.246178
NLSTSNPLGFFPDHQ	15	0.106955	0.150775	0.24261	0.350615	0.182032	0.242245	0.185079	0.280874	0.138448	0.231877	0.150866	0.254036
NTHPQAMQWNSTTFH	15	0.080825	0.128081	0.168588	0.344293	0.078941	0.137271	0.182612	0.268977	0.119793	0.219234	0.121175	0.19784
PLGFFPDHQLDPAFR	15	0.250199	0.298238	0.675869	0.602465	0.444404	0.581023	0.231528	0.229275	0.190999	0.186799	0.285786	0.372798
PLRNTHPQAMQWNST	15	0.101051	0.167607	0.115943	0.38196	0.061627	0.130661	0.233925	0.355655	0.167573	0.323021	0.126787	0.216476
PPASTNRQSGRQPTP	15	0.024313	0.035654	0.023049	0.079571	0.013292	0.028851	0.092587	0.163548	0.054022	0.107535	0.025916	0.044702
PTPLSPPLRNTHPQA	15	0.029781	0.051326	0.02676	0.122908	0.015655	0.035929	0.075457	0.141545	0.044717	0.098	0.03339	0.065794
RQSGRQPTPLSPPLR	15	0.054995	0.07893	0.040693	0.146228	0.024906	0.048422	0.108826	0.178194	0.05187	0.108191	0.054987	0.09629
TLPANPPPASTNRQS	15	0.030719	0.047408	0.021544	0.117753	0.014774	0.028378	0.088644	0.16373	0.042086	0.098939	0.038344	0.083929
LGFFPDHQLDPAFGA	15	0.211715	0.262484	0.612112	0.550759	0.380795	0.513401	0.229102	0.267298	0.175079	0.208006	0.241802	0.336074
STTSGFLGPLLVLQA	15	0.216564	0.27598	0.409169	0.620899	0.214722	0.367315	0.336206	0.435988	0.287659	0.448566	0.303302	0.429529
CCCTKPSDGNCTCIP	15	0.02197	0.02961	0.020536	0.065075	0.011823	0.020368	0.061239	0.107041	0.031747	0.064779	0.032992	0.053942
FNPNKDHWPEANQVG	15	0.059038	0.085665	0.103246	0.137793	0.082392	0.123374	0.148287	0.184498	0.092699	0.114253	0.079994	0.121162
LDPAFGANSNNPDWD	15	0.073959	0.125902	0.098081	0.248871	0.056526	0.123283	0.146766	0.227509	0.089944	0.166018	0.124016	0.201681
FLLVLLDYQGMLPVC	15	0.228959	0.31788	0.402704	0.558042	0.192958	0.314369	0.208329	0.245726	0.176885	0.238452	0.229972	0.333301
FLLVLVDYQGMLPVC	15	0.2074	0.298187	0.370694	0.558623	0.184349	0.293379	0.211155	0.263221	0.166008	0.243287	0.226757	0.328862
FLWVLLDYQGMLPVC	15	0.23895	0.334015	0.435963	0.557455	0.214802	0.337437	0.221743	0.262587	0.182035	0.230718	0.242089	0.342886
ILLLCLIFLLVLLDY	15	0.109782	0.150195	0.182404	0.307904	0.076407	0.1606	0.068632	0.090754	0.053197	0.077304	0.107431	0.16603
LIFLLVLLDYQGMLP	15	0.181207	0.278139	0.37024	0.48208	0.166254	0.278519	0.144854	0.160465	0.115773	0.155823	0.179009	0.25813
LTIPQSLDSWWTSLN	15	0.131843	0.169288	0.282731	0.375172	0.181889	0.232552	0.202391	0.264526	0.128682	0.207323	0.18211	0.253397
SPTSCPPICPGYRWM	15	0.036348	0.052534	0.035645	0.090738	0.020836	0.037966	0.082163	0.129305	0.04501	0.094921	0.043695	0.081964
SWLSLLVPFVQWFVG	15	0.193486	0.27143	0.311069	0.490031	0.150122	0.238723	0.212844	0.251217	0.154049	0.238288	0.218595	0.293011
TSMFPSCCCTKPSDG	15	0.04914	0.077635	0.076908	0.236223	0.052913	0.090634	0.115428	0.213436	0.083665	0.18215	0.06041	0.106598
VLLDYQGMLPVCPLL	15	0.224453	0.312296	0.376718	0.58386	0.184899	0.339743	0.298817	0.381312	0.227926	0.330454	0.272027	0.404226
WLSVIWMMWYWGPSL	15	0.18402	0.220023	0.448873	0.447382	0.28991	0.341142	0.231092	0.215279	0.167523	0.168502	0.241862	0.277176
SSTTSTGPCKTCTTP	15	0.026803	0.044378	0.015503	0.077177	0.010305	0.023619	0.094965	0.190984	0.054778	0.133575	0.035897	0.066848
AFGANSNNPDWDFNP	15	0.082001	0.13012	0.139421	0.24582	0.080967	0.146953	0.128974	0.152687	0.072259	0.093644	0.167291	0.250317
AKFLWEWASVRFSWL	15	0.270983	0.340233	0.408648	0.476328	0.255693	0.370655	0.424921	0.483747	0.368342	0.472432	0.276569	0.358864
CPLIPGSSTTSTGPC	15	0.024284	0.045963	0.023747	0.143887	0.013878	0.031334	0.092426	0.220096	0.052977	0.142406	0.049814	0.100602
CTCIPIPSSWAFAKF	15	0.100176	0.127354	0.176786	0.420542	0.109037	0.181865	0.270403	0.39368	0.180712	0.292938	0.156839	0.26547
CTKPSDGNCTCIPIP	15	0.038714	0.05413	0.045937	0.132096	0.020113	0.041721	0.102056	0.159604	0.07135	0.125162	0.076672	0.126429
DPRVRGLYFPAGGSS	15	0.088996	0.138223	0.162079	0.414586	0.11354	0.180582	0.217249	0.314697	0.136677	0.262488	0.128706	0.212268
FLFILLLCLIFLLVL	15	0.118345	0.157005	0.172096	0.300228	0.066066	0.132304	0.077867	0.110326	0.060071	0.090734	0.132666	0.186902
FPDHQLDPAFGANSN	15	0.099724	0.156249	0.128668	0.312372	0.083449	0.151505	0.218945	0.323632	0.144431	0.27019	0.127222	0.225166
FSRTGDPAPNMENIT	15	0.076002	0.122274	0.065559	0.159144	0.039157	0.079558	0.138676	0.189973	0.066279	0.103909	0.105314	0.163891
FVGLSPTVWLSVIWM	15	0.176869	0.234866	0.205076	0.496398	0.095523	0.166672	0.297321	0.409661	0.206231	0.37277	0.236416	0.359332
FVQWFVGLSPTVWLS	15	0.231717	0.301484	0.434014	0.591954	0.244545	0.3703	0.317263	0.395476	0.231805	0.348052	0.25028	0.380689
GAFGPGFTPPHGGLL	15	0.048799	0.064912	0.054463	0.150802	0.044024	0.067044	0.107379	0.167289	0.047634	0.083223	0.072758	0.106554
GFLGPLLVLQAGFFL	15	0.209147	0.284298	0.270235	0.6282	0.141324	0.280618	0.314397	0.436375	0.288897	0.502929	0.23748	0.39167
GGTPVCLGQNSQSPT	15	0.05084	0.085189	0.064661	0.254026	0.041428	0.088037	0.143878	0.232323	0.092379	0.204301	0.071391	0.137472
GLLGWSPQAQGILTT	15	0.142735	0.193811	0.364391	0.441609	0.267034	0.394921	0.29416	0.415571	0.219669	0.335678	0.198309	0.262258
GPCKTCTTPAQGTSM	15	0.048359	0.084309	0.036115	0.193581	0.031146	0.064022	0.143084	0.269596	0.102199	0.251858	0.07878	0.162002
GTNLSVPNPLGFFPD	15	0.107183	0.165187	0.115002	0.39395	0.061481	0.134429	0.17625	0.293534	0.119049	0.247852	0.155394	0.270722
IWMMWYWGPSLYNIL	15	0.235402	0.286251	0.522559	0.52015	0.343294	0.402997	0.34476	0.361596	0.232903	0.255951	0.328492	0.370513
KDTWPDANKVGAGAF	15	0.044336	0.068276	0.058633	0.130276	0.035777	0.076413	0.121823	0.197062	0.070108	0.142828	0.055004	0.103562
LLLCLIFLLVLLDYQ	15	0.153343	0.232732	0.234881	0.35362	0.109054	0.213947	0.089155	0.109912	0.07809	0.105976	0.136417	0.198187
LNFLGGTPVCLGQNS	15	0.138926	0.187974	0.180524	0.484056	0.119654	0.195723	0.308853	0.451044	0.200894	0.398442	0.2064	0.326208
LQAGFFLLTRILTIP	15	0.258958	0.336914	0.443748	0.618199	0.235868	0.343363	0.34982	0.435358	0.293199	0.378903	0.279928	0.367644
LTTVPAAPPPASTNR	15	0.057358	0.107071	0.054474	0.28454	0.032343	0.079992	0.152734	0.273488	0.083535	0.221293	0.090439	0.197972
MGGWSSKPRKGMGTN	15	0.022694	0.03053	0.038643	0.10992	0.031124	0.057181	0.096097	0.199452	0.058887	0.149606	0.025477	0.051845
NILSPFLPLLPIFFC	15	0.220748	0.27156	0.384533	0.572625	0.21438	0.334429	0.257434	0.316832	0.189204	0.271983	0.291487	0.400475
NITSGFLGPLLVLQA	15	0.219705	0.285521	0.429986	0.644569	0.226152	0.393584	0.370034	0.476424	0.296048	0.454638	0.308511	0.447087
NSNNPDWDFNPNKDT	15	0.057636	0.076599	0.084785	0.118582	0.070288	0.098036	0.078609	0.083971	0.047552	0.054118	0.096405	0.13662
PAAPPPASTNRQSGR	15	0.017329	0.027101	0.011086	0.055585	0.008705	0.01787	0.07779	0.146227	0.040941	0.102259	0.022382	0.036267
PAQGTSMFPSCCCTK	15	0.082843	0.118238	0.131902	0.332955	0.093243	0.147424	0.249136	0.407246	0.225726	0.507146	0.146072	0.24366
PDWDFNPNKDTWPDA	15	0.051385	0.08366	0.085926	0.145762	0.062332	0.098736	0.101093	0.122144	0.055867	0.073524	0.09284	0.143302
PGSSTTSTGPCKTCT	15	0.028047	0.045771	0.013046	0.071521	0.010788	0.021446	0.093494	0.188803	0.052009	0.130929	0.037898	0.068429
PNMENITSGFLGPLL	15	0.13536	0.17626	0.376318	0.508491	0.17014	0.306044	0.305472	0.412569	0.196805	0.296401	0.244941	0.344117
PPHGGLLGWSPQAQG	15	0.12309	0.165874	0.36276	0.435281	0.256307	0.390455	0.320562	0.421488	0.217484	0.324744	0.179166	0.254805
PQAMQWNSTTFHQTL	15	0.134692	0.184251	0.18902	0.389119	0.097468	0.1724	0.249349	0.327768	0.202682	0.308824	0.159476	0.244259
PSCCCTKPSDGNCTC	15	0.019793	0.028508	0.016423	0.064626	0.012942	0.022189	0.057284	0.108621	0.028439	0.078629	0.023259	0.045988
PSLYNILSPFLPLLP	15	0.24064	0.287804	0.41151	0.619268	0.213522	0.351467	0.280767	0.362518	0.191602	0.286145	0.308965	0.432207
QLDPAFGANSNNPDW	15	0.073018	0.116468	0.099697	0.28656	0.056753	0.12449	0.170955	0.271155	0.105143	0.212297	0.126027	0.209849
QTLQDPRVRGLYFPA	15	0.073295	0.107755	0.091925	0.273893	0.052821	0.100912	0.158587	0.261619	0.102384	0.190164	0.083927	0.126919
RDTHPQAMQWNSTTF	15	0.067229	0.104799	0.152955	0.263523	0.071352	0.121079	0.159844	0.244907	0.119582	0.218085	0.093955	0.155626
RFIIFLFILLLCLIF	15	0.127048	0.164424	0.216751	0.313414	0.10119	0.175237	0.090336	0.108285	0.079559	0.101874	0.12786	0.176729
RKGMGTNLSVPNPLG	15	0.11059	0.168977	0.128077	0.461768	0.064266	0.153188	0.250511	0.385071	0.168532	0.319662	0.179993	0.326253
SDGNCTCIPIPSSWA	15	0.077896	0.119261	0.114202	0.387745	0.076707	0.158495	0.217517	0.363501	0.181733	0.388304	0.158488	0.287203
SGRQPTPLSPPLRDT	15	0.050728	0.080416	0.035167	0.135326	0.02047	0.045184	0.088701	0.163322	0.050772	0.101596	0.050176	0.098801
SPPLRDTHPQAMQWN	15	0.123493	0.19157	0.145922	0.366028	0.067353	0.142358	0.222818	0.332254	0.178319	0.3196	0.152674	0.252827
SPTSNHSPTSCPPIC	15	0.034989	0.049975	0.027852	0.10034	0.020298	0.030429	0.086357	0.153925	0.050487	0.104254	0.053975	0.109252
SPTVWLSVIWMMWYW	15	0.1432	0.18391	0.165061	0.265531	0.071202	0.118869	0.163313	0.20139	0.12248	0.175483	0.144804	0.204039
SVPNPLGFFPDHQLD	15	0.23562	0.285729	0.683928	0.607846	0.459756	0.591808	0.229234	0.218329	0.189043	0.178426	0.304768	0.388182
SWAFAKFLWEWASVR	15	0.248703	0.301187	0.396422	0.396246	0.26535	0.365332	0.325031	0.324818	0.274847	0.31011	0.238447	0.272568
TCTTPAQGTSMFPSC	15	0.079826	0.122948	0.082239	0.289369	0.054681	0.110024	0.300396	0.477859	0.301766	0.621285	0.167255	0.288702
TNRQSGRQPTPLSPP	15	0.046548	0.065641	0.042902	0.134017	0.02412	0.044989	0.121751	0.191756	0.060541	0.113057	0.052884	0.090473
TSCPPICPGYRWMCL	15	0.056079	0.065219	0.127568	0.191991	0.073357	0.103135	0.170511	0.221634	0.091789	0.137503	0.090897	0.108616
VCLGQNSQSPTSNHS	15	0.045682	0.076791	0.048566	0.212275	0.038939	0.070376	0.126954	0.218483	0.072713	0.155722	0.062425	0.114132
WYWGPSLYNILSPFL	15	0.205269	0.251931	0.344129	0.563881	0.154098	0.264693	0.27026	0.33742	0.196907	0.263506	0.294465	0.380406
LLTKILTIPQSLDSW	15	0.174529	0.282078	0.185972	0.598525	0.103387	0.240202	0.195939	0.312502	0.149968	0.329834	0.174128	0.303455
AFAKYLWEWASVRFS	15	0.24386	0.297218	0.392984	0.430549	0.250613	0.336102	0.380391	0.422041	0.326658	0.41633	0.238266	0.298661
CCCTKPTDGNCTCIP	15	0.021672	0.03213	0.025061	0.069964	0.01285	0.021884	0.06486	0.11208	0.032681	0.069109	0.038664	0.059508
CIPIPSSWAFAKYLW	15	0.113192	0.150547	0.205313	0.379532	0.123812	0.205647	0.330035	0.394976	0.216111	0.306457	0.160852	0.24674
CKTCTTPAQGNSMFP	15	0.04461	0.072166	0.037026	0.173638	0.028327	0.055473	0.141853	0.253655	0.085098	0.21546	0.076749	0.146091
CPGYRWMCLRRFIIF	15	0.178242	0.221516	0.278912	0.393193	0.163538	0.220018	0.233847	0.258924	0.178052	0.210632	0.171174	0.22864
CPPICPGYRWMCLRR	15	0.069327	0.08613	0.143469	0.217942	0.106234	0.14252	0.203739	0.259578	0.119143	0.170562	0.089503	0.107427
DSWWTSLNFLGGSPV	15	0.144521	0.18818	0.224813	0.47746	0.096819	0.17905	0.23861	0.313756	0.195855	0.313513	0.176322	0.290635
FILLLCLIFLLVLLD	15	0.105669	0.134872	0.167713	0.29868	0.073594	0.148736	0.068925	0.095781	0.053337	0.077782	0.106165	0.161692
GNCTCIPIPSSWAFA	15	0.081572	0.124986	0.124043	0.416048	0.083382	0.164535	0.223887	0.375077	0.162443	0.356433	0.157169	0.290765
IIFLFILLLCLIFLL	15	0.115599	0.167107	0.203089	0.32089	0.090739	0.157985	0.087776	0.108602	0.071672	0.101974	0.131252	0.194559
ILTIPQSLDSWWTSL	15	0.133534	0.190017	0.192244	0.413303	0.094535	0.201	0.200912	0.271948	0.123799	0.220822	0.178775	0.287646
KPTDGNCTCIPIPSS	15	0.068859	0.10118	0.105305	0.319015	0.063397	0.133289	0.191981	0.323216	0.159963	0.325462	0.137528	0.244122
LCLIFLLVLLDYQGM	15	0.144694	0.222918	0.248575	0.394407	0.114363	0.215478	0.106155	0.120492	0.096257	0.142759	0.146544	0.218773
LGPLLVLQAGFFLLT	15	0.173446	0.225943	0.248353	0.55605	0.137246	0.239935	0.242321	0.351824	0.191068	0.34126	0.18602	0.308495
LGQNSQSPTSNHSPT	15	0.036458	0.063508	0.024537	0.130478	0.018843	0.037199	0.098424	0.192272	0.052045	0.134553	0.050055	0.090504
LIPGSTTTNTGPCKT	15	0.031127	0.051727	0.02197	0.145599	0.012697	0.031096	0.098631	0.201074	0.051928	0.13971	0.048595	0.093931
LLDYQGMLPVCPLIP	15	0.221242	0.310117	0.342411	0.580799	0.173981	0.324904	0.297098	0.386061	0.237756	0.343376	0.281471	0.405044
LRRFIIFLFILLLCL	15	0.144147	0.178654	0.232912	0.306405	0.108067	0.178932	0.10248	0.115055	0.079132	0.097132	0.131668	0.168176
LVLQAGFFLLTRILT	15	0.196374	0.253854	0.387875	0.462927	0.244132	0.327092	0.323828	0.39717	0.263929	0.290042	0.19397	0.231344
LYSIVSPFIPLLPIF	15	0.229181	0.271979	0.414127	0.629602	0.200242	0.354457	0.25758	0.326987	0.184022	0.266002	0.321815	0.43446
MFPSCCCTKPTDGNC	15	0.034056	0.051061	0.036892	0.137071	0.024608	0.049221	0.08048	0.15515	0.045147	0.117936	0.0379	0.071603
MMWYWGPSLYSIVSP	15	0.205228	0.253524	0.428846	0.479923	0.262395	0.334081	0.347476	0.406414	0.233839	0.324435	0.301557	0.369177
NTGPCKTCTTPAQGN	15	0.041739	0.075827	0.034581	0.182498	0.029427	0.058972	0.122964	0.231227	0.094641	0.22088	0.07146	0.149717
PQSLDSWWTSLNFLG	15	0.158071	0.185342	0.357835	0.40324	0.24947	0.300869	0.227386	0.27441	0.158858	0.21882	0.201164	0.263433
PSSWAFAKYLWEWAS	15	0.178244	0.225057	0.277874	0.304532	0.195419	0.269823	0.320222	0.328823	0.240112	0.274333	0.212827	0.24433
QGNSMFPSCCCTKPT	15	0.06034	0.090744	0.120127	0.28178	0.079396	0.131975	0.160096	0.255699	0.126558	0.23046	0.093217	0.160339
QWFVGLSPTVWLSAI	15	0.204073	0.283424	0.2576	0.552891	0.113453	0.236019	0.341889	0.46846	0.249444	0.422761	0.258109	0.39727
RFSWLSLLVPFVQWF	15	0.241668	0.320801	0.364157	0.53288	0.201152	0.29621	0.251708	0.304591	0.211554	0.303847	0.264406	0.349679
RWMCLRRFIIFLFIL	15	0.140641	0.177301	0.199342	0.275346	0.087391	0.143224	0.127607	0.155913	0.089257	0.105913	0.10015	0.131454
SAIWMMWYWGPSLYS	15	0.209933	0.243675	0.519346	0.502529	0.34873	0.410612	0.309784	0.305199	0.212176	0.196788	0.287018	0.315099
SPVCLGQNSQSPTSN	15	0.051265	0.083226	0.061307	0.249781	0.044726	0.086716	0.146975	0.231968	0.084373	0.181446	0.069032	0.121636
SQSPTSNHSPTSCPP	15	0.028565	0.040785	0.019977	0.088311	0.015259	0.027027	0.081805	0.142232	0.04212	0.105287	0.037494	0.073142
STTTNTGPCKTCTTP	15	0.025567	0.040892	0.017374	0.077148	0.010979	0.024744	0.091307	0.179094	0.053531	0.124729	0.033412	0.065668
TSGFLGPLLVLQAGF	15	0.212736	0.283186	0.333342	0.629716	0.1836	0.328731	0.344296	0.463571	0.312482	0.527534	0.271479	0.418721
TVWLSAIWMMWYWGP	15	0.17985	0.240038	0.249449	0.335123	0.104212	0.175961	0.250273	0.282349	0.212011	0.275978	0.224014	0.287407
VSPFIPLLPIFFCLW	15	0.172531	0.215888	0.29146	0.499163	0.141348	0.260697	0.159527	0.217461	0.148963	0.217132	0.206842	0.282734
WGPSLYSIVSPFIPL	15	0.214914	0.287614	0.331817	0.589789	0.145406	0.266586	0.275614	0.375056	0.190983	0.30353	0.28864	0.412483
YLWEWASVRFSWLSL	15	0.223038	0.286141	0.326843	0.424055	0.190315	0.281082	0.388254	0.455076	0.331287	0.447664	0.242767	0.318109
IGDPALNMENITSGFL	16	0.125134	0.203033	0.18645	0.546309	0.082869	0.201178	0.216507	0.326028	0.161365	0.301472	0.193373	0.305033
IWMMWYWGPSLYSIVS	16	0.241058	0.292346	0.545762	0.540311	0.346004	0.406152	0.366608	0.394801	0.24474	0.309945	0.335696	0.381778
MENITSGFLGPLLVLQ	16	0.203449	0.248803	0.438796	0.579686	0.212924	0.379205	0.382899	0.488101	0.272019	0.379925	0.318097	0.439459
PAFGANSNNPDWDFNP	16	0.088498	0.133468	0.163599	0.27217	0.094423	0.175661	0.137407	0.159432	0.084062	0.11244	0.188918	0.282275
PASTNRQSGRRQPTPL	16	0.02649	0.041505	0.031492	0.09602	0.019477	0.037298	0.115243	0.170046	0.05118	0.105493	0.027426	0.054611
PLGFFPDHQLDPAFGA	16	0.238604	0.278986	0.673956	0.607392	0.43289	0.561178	0.251931	0.275245	0.196226	0.214152	0.305269	0.390092
QAGFFLLTRILTIPQS	16	0.261907	0.352123	0.422406	0.701172	0.217921	0.335848	0.34687	0.409347	0.26956	0.423403	0.278996	0.415324
SWLSLLVPFVQWFVGL	16	0.187356	0.250812	0.289019	0.488663	0.137453	0.205893	0.197372	0.236493	0.156469	0.238428	0.220919	0.285677
TTNTGPCKTCTTPAQG	16	0.039542	0.074632	0.040115	0.203364	0.026639	0.059191	0.130295	0.232064	0.090247	0.229496	0.078559	0.16855
WASVRFSWLSLLVPFV	16	0.316561	0.408565	0.516345	0.615719	0.282041	0.379618	0.421597	0.461691	0.359284	0.447024	0.40268	0.490617
YWGPSLYSIVSPFIPL	16	0.220106	0.296425	0.361351	0.609343	0.169735	0.282826	0.318204	0.396506	0.213515	0.329476	0.310307	0.433128
LGFFPDHQLDPAFRANT	17	0.201608	0.255856	0.554547	0.517346	0.331688	0.451087	0.244132	0.28803	0.161988	0.208438	0.231756	0.304109
MGQNLSTSNPLGFFPDH	17	0.101166	0.171879	0.146415	0.46986	0.066068	0.144288	0.233997	0.360126	0.165444	0.32398	0.170941	0.306513
NPVPTTVSPISSIFSRI	17	0.11604	0.171207	0.107472	0.509097	0.048908	0.11073	0.225923	0.376396	0.13571	0.336957	0.172184	0.315792
SVRFSWLSLLVPFVQWF	17	0.282355	0.372289	0.480605	0.632243	0.245103	0.362046	0.380054	0.439537	0.299713	0.415502	0.353709	0.433765
VGAGAFGLGFTPPHGGL	17	0.093985	0.112963	0.191977	0.35575	0.107116	0.186805	0.227124	0.311495	0.119084	0.197474	0.143296	0.21934
PLRNTHPQAMQWNSTTF	17	0.092626	0.1625	0.169983	0.391056	0.076352	0.13675	0.207862	0.337148	0.161443	0.313874	0.135264	0.218496
APPPASTNRQSGRQPTP	17	0.021073	0.03452	0.019191	0.078551	0.011749	0.024196	0.091387	0.164012	0.047311	0.115151	0.024442	0.045755
PDHQLDPAFRANTANPD	17	0.138478	0.209763	0.184916	0.383493	0.100552	0.221606	0.241023	0.319245	0.16086	0.2344	0.1822	0.290803
FAKYLWEWASVRFSWLS	17	0.267905	0.345758	0.416048	0.48465	0.241371	0.349916	0.420213	0.492528	0.376885	0.494125	0.27628	0.352706
FAKYLWEWASVRFSWLSL	18	0.260715	0.322541	0.416916	0.466118	0.240639	0.347306	0.408912	0.464356	0.374877	0.478607	0.272399	0.333824
GMLPVCPLIPGSTTTNTG	18	0.073264	0.112664	0.09808	0.33067	0.043855	0.104832	0.118379	0.224034	0.084793	0.200286	0.105723	0.202122
GRQPTPLSPPLRNTHPQA	18	0.044745	0.069595	0.027156	0.122621	0.015882	0.033013	0.081666	0.153417	0.043662	0.09903	0.041804	0.08114
PICPGYRWMCLRRFIIFL	18	0.169137	0.201827	0.292577	0.393143	0.152796	0.218291	0.24652	0.276823	0.173651	0.204935	0.171504	0.22403
QAGFFLLTKILTIPLSLD	18	0.230867	0.312739	0.357691	0.682153	0.187174	0.313318	0.277981	0.321039	0.200448	0.320179	0.277161	0.412254
QAGFFLLTKILTIPQSLD	18	0.239609	0.313198	0.340887	0.64454	0.180983	0.291871	0.294453	0.34151	0.228419	0.384308	0.232844	0.371011
QAGFFLLTRILTIPLSLD	18	0.272127	0.35979	0.396881	0.705995	0.201895	0.336404	0.301739	0.361925	0.217175	0.35314	0.302868	0.437022
QAGFFLLTRILTIPQSLD	18	0.27145	0.360389	0.389666	0.680586	0.199486	0.32535	0.310421	0.361439	0.240082	0.408441	0.261352	0.405613
QAGFFLLTRILTIPQSLH	18	0.261005	0.35656	0.389293	0.689811	0.197537	0.317696	0.308506	0.364433	0.239974	0.409364	0.253672	0.396597
QAGFFSLTKILTIPLSLD	18	0.230148	0.320363	0.35113	0.709252	0.162005	0.312059	0.305065	0.400966	0.219162	0.407356	0.300031	0.46866
QAGFFSLTKILTIPQSLD	18	0.228036	0.311325	0.319357	0.659988	0.150071	0.289417	0.31403	0.41344	0.237337	0.449538	0.250834	0.424946
QAGFFWLTRILTIPQSLD	18	0.279655	0.349721	0.430625	0.66794	0.222706	0.354963	0.343371	0.389556	0.269246	0.428282	0.279774	0.414212
QAVCFLLTKILKIPQSLD	18	0.17902	0.267364	0.282177	0.577659	0.111513	0.230418	0.262529	0.360185	0.180959	0.352569	0.169682	0.298785
QAVCFLLTKILTIPQSLD	18	0.198691	0.282011	0.270421	0.617207	0.117399	0.255467	0.247257	0.31281	0.195472	0.360061	0.20272	0.354271
QAVFFLLTRILTIPQSLD	18	0.253956	0.34485	0.340234	0.665564	0.1479	0.301265	0.27201	0.332635	0.214483	0.394779	0.240906	0.386165
RVRGLYFPAGGSSSGTVN	18	0.083535	0.115972	0.131268	0.362531	0.081633	0.133691	0.187999	0.288118	0.104669	0.208706	0.118973	0.202292
VPFVQWFVGLSPTVWLSA	18	0.24628	0.311539	0.452018	0.610698	0.244754	0.364888	0.312345	0.417013	0.251207	0.403692	0.274121	0.391684
SSGTVSPAQNTVSAISSI	18	0.099782	0.164978	0.086278	0.398656	0.038181	0.10528	0.26693	0.441019	0.187364	0.42315	0.178021	0.321572
QLDPAFGANSNNPDWDFN	18	0.082792	0.125196	0.139161	0.28425	0.081307	0.142688	0.164085	0.247631	0.10248	0.192464	0.164172	0.250851
AGFFLLTKILTIPQSLDS	18	0.223893	0.299358	0.292256	0.649488	0.134773	0.266249	0.264764	0.32946	0.210173	0.387246	0.212054	0.364956
RQGMGTNLSVPNPLGFFP	18	0.118782	0.184	0.170453	0.464081	0.06864	0.175557	0.226913	0.356659	0.158754	0.310085	0.201008	0.341869
WTSLNFLGGAPTCPGQNS	18	0.097286	0.140681	0.132398	0.398701	0.072447	0.142105	0.219239	0.339764	0.152337	0.291751	0.124477	0.224615
WTSLNFLGGTPVCLGQNS	18	0.14503	0.205193	0.225243	0.533156	0.116106	0.20269	0.298708	0.425265	0.188573	0.344515	0.222174	0.334329
DPRVRGLYFPAGGSSSGTV	19	0.098313	0.125243	0.13878	0.37378	0.097533	0.143122	0.205656	0.308798	0.121083	0.237804	0.131346	0.214705
GMLPVCPLIPGSSTTSTGP	19	0.075823	0.119126	0.096491	0.349011	0.046108	0.105407	0.134042	0.250615	0.093984	0.219142	0.118709	0.222979
IIFLFILLLCLIFLLVLLD	19	0.121056	0.158643	0.205948	0.34059	0.091401	0.165036	0.086302	0.120359	0.070333	0.102723	0.132846	0.195565
SGFLGPLLVLQAGFFLLTR	19	0.222427	0.286743	0.361268	0.618365	0.245616	0.338862	0.33769	0.448168	0.29319	0.436841	0.259257	0.380693
TRILTIPQSLDSWWTSLNF	19	0.189145	0.264529	0.344209	0.517811	0.213505	0.294418	0.217157	0.30062	0.16665	0.282679	0.232354	0.332771
YQAGFFLLTRILTIPQSLD	19	0.271801	0.358757	0.385582	0.667915	0.224897	0.327358	0.330932	0.408953	0.255576	0.405439	0.276476	0.405957
TNLSVPNPLGFFPDHQLDP	19	0.240634	0.286453	0.660921	0.597801	0.442515	0.554678	0.236316	0.24902	0.183178	0.221253	0.308838	0.389738
ASARFSWLSLLVPFVQWFV	19	0.248089	0.317926	0.38458	0.515467	0.208974	0.277032	0.337157	0.362419	0.267505	0.348081	0.306044	0.369819
SARFSWLSLLVPFVQWFVG	19	0.240603	0.308862	0.372245	0.503485	0.198662	0.265915	0.313188	0.344835	0.252464	0.332992	0.2872	0.355179
DSWWTSLNFLGGSPVCLGQ	19	0.159512	0.206515	0.234591	0.513198	0.114935	0.197308	0.280338	0.400902	0.193325	0.318152	0.222402	0.336812
SWWTSLNFLGGSPVCLGQN	19	0.156886	0.20391	0.211634	0.512124	0.107961	0.183284	0.285484	0.411453	0.18481	0.322109	0.214816	0.333699
FLFILLLCLIFLLVLLDYQ	19	0.154583	0.218142	0.2418	0.356564	0.101503	0.20233	0.098087	0.121749	0.078288	0.112123	0.149297	0.223681
LFILLLCLIFLLVLLDYQG	19	0.137959	0.198495	0.240333	0.372283	0.106725	0.200793	0.095988	0.115841	0.078614	0.122693	0.135246	0.217366
GYRWMCLRRFIIFLFILLL	19	0.163643	0.203852	0.240122	0.345613	0.124692	0.183136	0.162956	0.183614	0.12114	0.149585	0.160488	0.21694
YRWMCLRRFIIFLFILLLC	19	0.154885	0.186392	0.235076	0.338523	0.125427	0.186168	0.144029	0.163951	0.105366	0.133805	0.15322	0.200125
HQLDPAFGANSTNPDWDFN	19	0.104962	0.158144	0.157555	0.336647	0.085623	0.171827	0.204262	0.300651	0.129358	0.223665	0.197299	0.30094
QLDPAFGANSTNPDWDFNP	19	0.103674	0.153805	0.162138	0.326363	0.086576	0.173754	0.185214	0.276361	0.121014	0.201793	0.201354	0.297459
LLTRILTIPQSLDSWWTSL	19	0.197415	0.291269	0.241307	0.600757	0.132234	0.276261	0.221172	0.318131	0.177095	0.345882	0.220078	0.353951
LTRILTIPQSLDSWWTSLN	19	0.195608	0.279886	0.296205	0.562819	0.184271	0.288369	0.220482	0.31329	0.169586	0.316036	0.235089	0.344652
LSPTVWLSVIWMMWYWGPS	19	0.161825	0.209259	0.253985	0.347126	0.154621	0.194855	0.183052	0.233555	0.13964	0.216743	0.185574	0.245889
SPTVWLSVIWMMWYWGPSL	19	0.180263	0.228313	0.429829	0.428272	0.272575	0.302584	0.204159	0.211252	0.147885	0.174857	0.236488	0.270843
NCTCIPIPSSWAFGKFLWE	19	0.137812	0.163721	0.236681	0.399602	0.143192	0.207645	0.261706	0.345758	0.196842	0.294659	0.182998	0.269614
CTCIPIPSSWAFGKFLWEW	19	0.143397	0.169146	0.23768	0.375777	0.142448	0.206599	0.267444	0.334809	0.195903	0.268948	0.177082	0.256955
PLLVLQAGFFLLTRILTIP	19	0.248587	0.309601	0.372209	0.533558	0.190616	0.265541	0.304872	0.373089	0.238577	0.298462	0.253773	0.316673
LLVLQAGFFLLTRILTIPQ	19	0.248044	0.31667	0.372148	0.597508	0.193209	0.283333	0.313781	0.386965	0.242716	0.323796	0.251209	0.345923
QLDPAFRANTANPDWDFNP	19	0.158936	0.23851	0.280604	0.45687	0.150471	0.319544	0.23077	0.299145	0.184628	0.255901	0.264889	0.383792
LDPAFRANTANPDWDFNPN	19	0.158369	0.237994	0.276576	0.451194	0.150385	0.315823	0.21456	0.288662	0.179978	0.24723	0.268008	0.384387
SCCCTKPTDGNCTCIPIPS	19	0.043763	0.063246	0.057215	0.157411	0.024848	0.05952	0.115331	0.198427	0.084848	0.191487	0.081703	0.143179
CCCTKPTDGNCTCIPIPSS	19	0.067357	0.092652	0.095904	0.280939	0.054057	0.11908	0.152263	0.26589	0.120728	0.264021	0.121571	0.204935
SLDSWWTSLNFLGGTTVCL	19	0.158875	0.213126	0.305154	0.496413	0.182936	0.235813	0.250642	0.314468	0.182259	0.270577	0.226813	0.325006
LDSWWTSLNFLGGTTVCLG	19	0.154188	0.20832	0.268194	0.506606	0.150142	0.207779	0.268746	0.371034	0.196182	0.336058	0.221457	0.347968
SPAQNTVSAISSILSKTGD	19	0.134835	0.216084	0.118964	0.592252	0.051514	0.135572	0.323581	0.525017	0.228095	0.506163	0.200346	0.361678
PAQNTVSAISSILSKTGDP	19	0.130137	0.210627	0.115949	0.590224	0.05069	0.133763	0.320779	0.522569	0.219914	0.496578	0.193827	0.354499
SPTSCPPTCPGYRWMCLRR	19	0.055425	0.065264	0.100571	0.14096	0.071112	0.090513	0.118491	0.148237	0.077134	0.090961	0.067177	0.086113
PTSCPPTCPGYRWMCLRRF	19	0.117385	0.147944	0.189931	0.281066	0.118992	0.154848	0.170964	0.187571	0.120556	0.135629	0.136379	0.178379
WLSLLVPFVQWFVGLSPTV	19	0.208911	0.267719	0.422307	0.546527	0.23298	0.342696	0.240154	0.285411	0.209428	0.281757	0.229053	0.297406
LSLLVPFVQWFVGLSPTVW	19	0.230913	0.282116	0.416615	0.553722	0.228199	0.341178	0.254536	0.304679	0.21288	0.289299	0.235872	0.317144
VLQAGFFLITRILTIPQSL	19	0.252526	0.333319	0.374644	0.681918	0.207854	0.313959	0.318847	0.413445	0.246193	0.391566	0.26371	0.390595
LQAGFFLITRILTIPQSLD	19	0.256313	0.345839	0.375528	0.686092	0.210546	0.327626	0.315718	0.409476	0.245974	0.409949	0.271926	0.409219
SQISSHSPTCCPPICPGYR	19	0.062459	0.085242	0.082203	0.244716	0.039838	0.086245	0.120552	0.201628	0.07996	0.156097	0.089056	0.162069
QISSHSPTCCPPICPGYRW	19	0.056719	0.077855	0.073091	0.223225	0.035974	0.077038	0.109308	0.179673	0.072439	0.145325	0.082997	0.147022
VLQAGFFLLTRILTIPQSL	19	0.26432	0.346603	0.378305	0.661935	0.208578	0.312259	0.32136	0.415131	0.253939	0.384746	0.263541	0.380543
LQAGFFLLTRILTIPQSLD	19	0.267761	0.358055	0.374581	0.668379	0.20799	0.322106	0.320065	0.408775	0.251593	0.399913	0.26946	0.400981
PDHQLDPAFRANTANPDWD	19	0.1519	0.232303	0.231237	0.430926	0.124434	0.286924	0.249149	0.321443	0.183948	0.26361	0.212834	0.325486
DHQLDPAFRANTANPDWDF	19	0.1628	0.245747	0.285076	0.464958	0.150215	0.326639	0.262435	0.32997	0.198676	0.271201	0.258593	0.377714
