# Supplementary material for: Exploratory analysis of HLA variants and occult HBV infection: a multicenter case-control study in Chinese blood donors
Source: Research Square preprint supplement (doi:10.21203/rs.3.rs-7323223/v1), 2025-09-01
Supplement: Supplementary file 9 [file Table S5-interactions.xlsx]

## Sheet: A
Table S5. Statistical results of interactions between HLA variants and anti-HBs titers/gender/Age.
(A) Mean and median OBI probability stratified by rs10093 genotype and anti-HBs titers
rs10093 Genotype	anti-HBs (IU/mL)	Sample Size	Mean OBI Prob. (95% CI)	Median OBI Prob. (IQR)
GG	>50	5	73.77% (48.97-98.54)	95.51% (39.72-98.60)
	10~50	5	58.17% (34.42-84.91)	48.86% (48.80-80.57)
	≤10	24	26.48% (14.36-40.14)	11.01% (1.16-43.45)
CG	>50	1	100.00% (/)	100.00% (100.00-100.00)
	10~50	4	86.06% (76.14-97.15)	86.39% (77.63-94.82)
	≤10	36	36.37% (25.86-47.81)	25.34% (4.76-63.66)
CC	>50	9	94.28% (87.14-99.07)	97.60% (96.39-99.94)
	10~50	16	81.02% (72.11-90.32)	91.27% (69.79-97.06)
	≤10	47	46.45% (37.45-55.60)	56.47% (9.50-73.34)
Notes: Bootstrap confidence intervals were calculated with 1,000 resamples (smallest subgroup n=4).

## Sheet: B
(B) Comparison analysis between rs1135085 genotypes in overall/female/male groups
Analysis Type	rs1135085 Genotype Comparison Group	Sample Size (n1/n2)	Dunn's test with BH correction				Kruskal-Wallis rank sum test
			Z-value	P	Padj	Significance	c2	P
Overall	T_carrier vs DRB4-null	32/65	3.03	0.00244	0.00366	​**​	26.47	<0.001
	T_carrier vs CC	32/50	5.13	<0.001	<0.001	***
	DRB4-null vs CC	65/50	2.7	0.00692	0.00692	​**​
Female-Specific	T_carrier vs DRB4-null	9/18	1.66	0.097	0.097	ns
	T_carrier vs CC	9/10	3.63	<0.001	<0.001	​**​*
	DRB4-null vs CC	18/10	2.51	0.0121	0.0242	*
Male-Specific	T_carrier vs DRB4-null	23/47	2.67	0.00748	0.015	*
	T_carrier vs CC	23/40	3.85	<0.001	<0.001	​**​*
	DRB4-null vs CC	47/40	1.53	0.127	0.127	ns
Notes: Z-values indicating the direction of difference (positive = higher OBI risk in group2). All significant comparisons show CC> DRB4-null > T_carrier in OBI risk magnitude.

## Sheet: C
(C) Mean and median OBI probability stratified by rs1135085 genotype and gender
rs1135085 Genotype	Gender	Sample Size	Mean OBI Prob. (95% CI)	Median OBI Prob. (IQR)	U	P	Effect size (Cliff's δ)	Cliff's δ 95% CI	Effect Interpretation
T_carrier (CT/TT)	Female	9	16.65% (0.6-42.7)	0.13% (0.1-5.1)	47	0.017	-0.55	[-0.85, 0.05]	Large
	Male	23	26.52% (14.8-40.4)	13.31% (5.7-28.1)
DRB4_null	Female	18	33.73% (19.3-48.3)	33.34% (2.6-60.5)	254	0.013	-0.4	[-0.63,-0.11]	Medium
	Male	47	55.74% (46.4-65.6)	68.25% (19.9-86.3)
CC	Female	10	73.31% (58.3-87.2)	75.54% (65.0-95.4)	211	0.802	0.06	[-0.28, 0.38]	Negligible
	Male	40	66.42% (55.6-76.4)	75.13% (38.8-97.1)

## Sheet: D
(D) Mean and median OBI probability stratified by rs713032 genotype and age point
rs713032 Genotype	Age	OBI Probability (%)	95% CI (%)
TT	20	0.3	[0.0, 12.5]
CT/Other	20	5.6	[0.9, 28.2]
CC	20	51.8	[13.5, 88.1]
TT	30	3.8	[0.4, 30.6]
CT/Other	30	22.2	[7.1, 51.3]
CC	30	67.1	[32.4, 89.7]
TT	40	32.3	[10.1, 67.0]
CT/Other	40	57.6	[33.7, 78.4]
CC	40	79.5	[52.7, 93.1]
TT	50	85.1	[49.7, 97.0]
CT/Other	50	86.6	[67.4, 95.3]
CC	50	88	[63.8, 96.8]
TT	60	98.6	[78.2, 99.9]
CT/Other	60	96.9	[85.6, 99.4]
CC	60	93.3	[67.7, 98.9]

## Sheet: E
(E) Proportion of OBI and HBsAg+ donors stratified by age and rs713032 genotype (CC and Other)
Age Group	Group	rs713032 CC			rs713032 Other Genotypes
		n	Proportion	95% CI	n	Proportion	95% CI
<30	HBsAg+	4	0.182	[2.1, 34.3]	18	0.818	[65.7,97.9]
	OBI	3	0.6	[17.1, 100]	2	0.4	[0.0,82.9]
30-40	HBsAg+	3	0.143	[0, 29.3]	18	0.857	[70.7,100.0]
	OBI	3	0.176	[0, 35.8]	14	0.824	[64.2, 100.0]
40-50	HBsAg+	4	0.2	[2.5, 37.5]	16	0.8	[62.5, 97.5]
	OBI	10	0.385	[19.8, 57.2]	16	0.615	[42.8, 80.2]
>=50	HBsAg+	3	0.3	[1.6, 58.4]	7	0.7	[41.6, 98.4]
	OBI	6	0.231	[6.9, 39.3]	20	0.769	[60.7, 93.1]
