# Supplementary material for: Exploratory analysis of HLA variants and occult HBV infection: a multicenter case-control study in Chinese blood donors
Source: Research Square preprint supplement (doi:10.21203/rs.3.rs-7323223/v1), 2025-09-01
Supplement: Supplementary file 13 [file Table S6-model.xlsx]

## Sheet: A
Table S6. Models predicting the propobility of HBV-exposed individual being OBI status and model performance comparisons between baseline and baseline-genetic models (B model vs. B-G model), and between serological and serological-genetic models (S model vs. S-G model).
(A) Variables and interactions used in the construction of nested logistic regression models for the S-G and B-G model.
S-G model
Component	Variables/Interactions	Parameter Type
Genetic variants	rs10093, rs1135085, rs1136692, rs713032	Main effect
Clinical markers	anti_HBs, anti_HBe
Demographic factors	age, sex
Gene-environment interactions	rs10093 × anti_HBs	Interaction
	rs1135085 × sex
	rs1136692 × anti_HBs
	rs713032 × age
B-G model
Component	Variables/Interactions	Parameter Type
Genetic variants	rs10093, rs1135085, rs1136692, rs713032	Main effect
Demographic factors	age, sex
Gene-environment interactions	rs1135085 × sex	Interaction
	rs713032 × age

## Sheet: B
(B) Performance metrics of the S-G, S B-G and B model.
1. Mean AUC, accuracy, sensitivity and specificity of model S-G, S, B-G and B by 1000 times with 0.5 as threshold (7:3 splits)
Model	Mean AUC	AUC (SD)	AUC (95% CI)	Mean Accuracy	Mean Sensitivity	Mean Specificity	N_Splits
S-G	0.87805	0.0488235	0.762-0.95	0.794545	0.793301	0.800352	1000
S	0.836363	0.0520335	0.725-0.929	0.752318	0.772998	0.737683	1000
B-G	0.780212	0.0580163	0.668-0.885	0.712614	0.73612	0.695412	1000
B	0.715047	0.0683823	0.582-0.842	0.648227	0.69219	0.612473	1000
2. DeLong's test for two correlated ROC curves
Comparison	AUC_Model S/B-G	AUC_Model S/B	Z_Statistic	P_Value
S-G Model vs C Model	0.931692	0.836727	3.60088	0.000317147
B-G Model vs. B Model	0.82997	0.723621	2.91213	0.00358974
3. Model S-G vs. S Reclassification table					4. Model B-G vs. B Reclassification table
Outcome: chronic HBsAg+ (controls|0)					Outcome: chronic HBsAg+ (controls|0)
Initial Model (S)	Model S-G				Initial Model (B)	Model B-G
	[0,0.5)	[0.5,1]	% reclassified			[0,0.5)	[0.5,1]	% reclassified
[0,0.5)	48	4	8		[0,0.5)	36	7	16
[0.5,1]	14	7	67		[0.5,1]	16	14	53
Outcome: OBI (cases|1)					Outcome: OBI (cases|1)
Initial Model (S)	Model S-G				Initial Model (B)	Model B-G
	[0,0.5)	[0.5,1]	% reclassified			[0,0.5)	[0.5,1]	% reclassified
[0,0.5)	8	7	47		[0,0.5)	13	9	41
[0.5,1]	5	54	8		[0.5,1]	5	47	10
Combined Data					Combined Data
Initial Model (S)	Model S-G				Initial Model (B)	Model B-G
	[0,0.5)	[0.5,1]	% reclassified			[0,0.5)	[0.5,1]	% reclassified
[0,0.5)	56	11	16		[0,0.5)	49	16	25
[0.5,1]	19	61	24		[0.5,1]	21	61	26
NRI(Categorical) [95% CI]: 0.164 [ 0.0213 - 0.3067 ] ; p-value: 0.0243					NRI(Categorical) [95% CI]: 0.1773 [ 0.0178 - 0.3369 ] ; p-value: 0.02935
NRI(Continuous) [95% CI]: 1.1311 [ 0.8681 - 1.394 ] ; p-value: 0					NRI(Continuous) [95% CI]: 0.9919 [ 0.7128 - 1.2709 ] ; p-value: 0
IDI [95% CI]: 0.2408 [ 0.1716 - 0.3101 ] ; p-value: 0					IDI [95% CI]: 0.1654 [ 0.107 - 0.2237 ] ; p-value: 0

## Sheet: C
(C) Reclassification results (B-G vs. B)
Participant ID	B_Probability	B_G_Probability	B_Class	B_G_Class	True_Label	Reclassification	Correctness	Probability_Change
p001	0.679216	0.869281	1	1	1	No change	Correct	0.190065
p002	0.696324	0.637521	1	1	1	No change	Correct	-0.0588032
p003	0.235436	0.087208	0	0	0	No change	Correct	-0.148228
p004	0.407538	0.756761	0	1	1	Up	Correct	0.349224
p005	0.67908	0.808032	1	1	1	No change	Correct	0.128952
p006	0.526743	0.356991	1	0	0	Down	Correct	-0.169752
p007	0.3883	0.424727	0	0	0	No change	Correct	0.0364267
p008	0.235436	0.0850725	0	0	0	No change	Correct	-0.150364
p009	0.60547	0.807021	1	1	1	No change	Correct	0.201551
p010	0.350901	0.495933	0	0	1	No change	Incorrect	0.145032
p011	0.661332	0.381303	1	0	0	Down	Correct	-0.280029
p012	0.170967	0.0943224	0	0	0	No change	Correct	-0.076645
p013	0.679216	0.388384	1	0	0	Down	Correct	-0.290832
p014	0.661332	0.612224	1	1	1	No change	Correct	-0.0491084
p015	0.713034	0.401679	1	0	0	Down	Correct	-0.311355
p016	0.546709	0.370138	1	0	0	Down	Correct	-0.176571
p017	0.506691	0.370311	1	0	0	Down	Correct	-0.136381
p018	0.713034	0.840798	1	1	0	No change	Incorrect	0.127764
p019	0.713034	0.583287	1	1	1	No change	Correct	-0.129747
p020	0.250198	0.0431394	0	0	0	No change	Correct	-0.207058
p021	0.75971	0.849694	1	1	1	No change	Correct	0.0899837
p022	0.250315	0.054106	0	0	1	No change	Incorrect	-0.196209
p023	0.75971	0.916533	1	1	1	No change	Correct	0.156823
p024	0.332697	0.658718	0	1	1	Up	Correct	0.326022
p025	0.298044	0.638107	0	1	0	Up	Incorrect	0.340064
p026	0.446664	0.587111	0	1	1	Up	Correct	0.140448
p027	0.369259	0.24299	0	0	0	No change	Correct	-0.126269
p028	0.194949	0.284355	0	0	1	No change	Incorrect	0.0894061
p029	0.407387	0.382409	0	0	0	No change	Correct	-0.0249779
p030	0.75971	0.916533	1	1	1	No change	Correct	0.156823
p031	0.696456	0.838653	1	1	1	No change	Correct	0.142197
p032	0.643119	0.35974	1	0	0	Down	Correct	-0.283379
p033	0.643119	0.851806	1	1	1	No change	Correct	0.208687
p034	0.566679	0.286756	1	0	0	Down	Correct	-0.279923
p035	0.506691	0.336056	1	0	0	Down	Correct	-0.170635
p036	0.369259	0.24299	0	0	0	No change	Correct	-0.126269
p037	0.566526	0.78965	1	1	1	No change	Correct	0.223123
p038	0.696324	0.712541	1	1	1	No change	Correct	0.0162165
p039	0.75971	0.874527	1	1	1	No change	Correct	0.114817
p040	0.446818	0.46386	0	0	1	No change	Incorrect	0.0170421
p041	0.744745	0.671085	1	1	1	No change	Correct	-0.0736599
p042	0.20776	0.135675	0	0	0	No change	Correct	-0.0720848
p043	0.661332	0.800074	1	1	1	No change	Correct	0.138742
p044	0.388152	0.518646	0	1	0	Up	Incorrect	0.130494
p045	0.546709	0.541895	1	1	0	No change	Incorrect	-0.00481442
p046	0.696324	0.349807	1	0	1	Down	Incorrect	-0.346517
p047	0.624483	0.224113	1	0	0	Down	Correct	-0.40037
p048	0.81341	0.962244	1	1	1	No change	Correct	0.148833
p049	0.744745	0.72627	1	1	0	No change	Incorrect	-0.0184755
p050	0.67908	0.727648	1	1	1	No change	Correct	0.0485679
p051	0.67908	0.520121	1	1	1	No change	Correct	-0.158959
p052	0.661332	0.797257	1	1	1	No change	Correct	0.135924
p053	0.526743	0.894871	1	1	1	No change	Correct	0.368128
p054	0.446818	0.136581	0	0	0	No change	Correct	-0.310237
p055	0.643119	0.491598	1	0	1	Down	Incorrect	-0.151521
p056	0.713034	0.840798	1	1	1	No change	Correct	0.127764
p057	0.526899	0.643126	1	1	0	No change	Incorrect	0.116227
p058	0.466587	0.562825	0	1	0	Up	Incorrect	0.0962382
p059	0.369259	0.252048	0	0	0	No change	Correct	-0.117211
p060	0.787799	0.893456	1	1	1	No change	Correct	0.105657
p061	0.298044	0.40426	0	0	0	No change	Correct	0.106216
p062	0.388152	0.523019	0	1	0	Up	Incorrect	0.134867
p063	0.546864	0.611689	1	1	0	No change	Incorrect	0.0648252
p064	0.643119	0.694705	1	1	1	No change	Correct	0.0515861
p065	0.369259	0.0734367	0	0	0	No change	Correct	-0.295823
p066	0.407387	0.793404	0	1	1	Up	Correct	0.386017
p067	0.67908	0.320634	1	0	0	Down	Correct	-0.358445
p068	0.696324	0.276273	1	0	0	Down	Correct	-0.420051
p069	0.466587	0.515186	0	1	0	Up	Incorrect	0.0485992
p070	0.332697	0.566915	0	1	1	Up	Correct	0.234218
p071	0.624629	0.842922	1	1	1	No change	Correct	0.218293
p072	0.713034	0.29514	1	0	0	Down	Correct	-0.417894
p073	0.281519	0.0707912	0	0	0	No change	Correct	-0.210728
p074	0.182653	0.0847572	0	0	0	No change	Correct	-0.0978955
p075	0.369259	0.495536	0	0	1	No change	Incorrect	0.126277
p076	0.643119	0.328317	1	0	0	Down	Correct	-0.314802
p077	0.170967	0.0241459	0	0	0	No change	Correct	-0.146822
p078	0.729181	0.852789	1	1	1	No change	Correct	0.123608
p079	0.566526	0.27904	1	0	1	Down	Incorrect	-0.287487
p080	0.170967	0.244911	0	0	0	No change	Correct	0.0739434
p081	0.566526	0.798822	1	1	0	No change	Incorrect	0.232296
p082	0.729304	0.796684	1	1	1	No change	Correct	0.0673797
p083	0.332697	0.0852111	0	0	0	No change	Correct	-0.247486
p084	0.506691	0.458345	1	0	1	Down	Incorrect	-0.048346
p085	0.149309	0.0592006	0	0	0	No change	Correct	-0.0901088
p086	0.67908	0.814456	1	1	1	No change	Correct	0.135377
p087	0.566526	0.864247	1	1	0	No change	Incorrect	0.297721
p088	0.315113	0.114055	0	0	0	No change	Correct	-0.201059
p089	0.526899	0.186321	1	0	0	Down	Correct	-0.340578
p090	0.713161	0.755601	1	1	1	No change	Correct	0.0424396
p091	0.466587	0.467825	0	0	1	No change	Incorrect	0.00123826
p092	0.624483	0.768847	1	1	0	No change	Incorrect	0.144364
p093	0.696324	0.825517	1	1	1	No change	Correct	0.129193
p094	0.1598	0.506851	0	1	0	Up	Incorrect	0.347051
p095	0.315113	0.431005	0	0	1	No change	Incorrect	0.115892
p096	0.75971	0.809146	1	1	0	No change	Incorrect	0.049436
p097	0.159883	0.0726748	0	0	0	No change	Correct	-0.0872087
p098	0.847257	0.954499	1	1	1	No change	Correct	0.107242
p099	0.643119	0.825917	1	1	1	No change	Correct	0.182798
p100	0.75971	0.51144	1	1	0	No change	Incorrect	-0.24827
p101	0.3883	0.542069	0	1	1	Up	Correct	0.153769
p102	0.407387	0.322563	0	0	1	No change	Incorrect	-0.0848236
p103	0.696456	0.646265	1	1	0	No change	Incorrect	-0.0501914
p104	0.713034	0.583287	1	1	1	No change	Correct	-0.129747
p105	0.526743	0.767456	1	1	1	No change	Correct	0.240713
p106	0.315113	0.426713	0	0	1	No change	Incorrect	0.1116
p107	0.729181	0.905779	1	1	1	No change	Correct	0.176597
p108	0.194949	0.200892	0	0	1	No change	Incorrect	0.00594341
p109	0.42691	0.298389	0	0	0	No change	Correct	-0.128522
p110	0.369259	0.209453	0	0	0	No change	Correct	-0.159807
p111	0.67908	0.420495	1	0	0	Down	Correct	-0.258584
p112	0.369405	0.453643	0	0	0	No change	Correct	0.0842379
p113	0.407387	0.546022	0	1	1	Up	Correct	0.138635
p114	0.566526	0.864247	1	1	1	No change	Correct	0.297721
p115	0.42691	0.100581	0	0	0	No change	Correct	-0.326329
p116	0.67908	0.873668	1	1	1	No change	Correct	0.194588
p117	0.586133	0.153198	1	0	1	Down	Incorrect	-0.432934
p118	0.369405	0.0532607	0	0	0	No change	Correct	-0.316144
p119	0.350759	0.24201	0	0	0	No change	Correct	-0.108749
p120	0.729181	0.74889	1	1	1	No change	Correct	0.0197088
p121	0.466587	0.714346	0	1	1	Up	Correct	0.247759
p122	0.332697	0.0224828	0	0	1	No change	Incorrect	-0.310214
p123	0.407387	0.37828	0	0	0	No change	Correct	-0.0291074
p124	0.281519	0.292035	0	0	1	No change	Incorrect	0.0105163
p125	0.506691	0.656329	1	1	0	No change	Incorrect	0.149638
p126	0.696456	0.579408	1	1	0	No change	Incorrect	-0.117048
p127	0.506691	0.607683	1	1	1	No change	Correct	0.100991
p128	0.661332	0.565815	1	1	1	No change	Correct	-0.0955171
p129	0.759824	0.937033	1	1	1	No change	Correct	0.17721
p130	0.696324	0.763224	1	1	1	No change	Correct	0.0668997
p131	0.566526	0.671505	1	1	0	No change	Incorrect	0.104979
p132	0.566526	0.864247	1	1	1	No change	Correct	0.297721
p133	0.787799	0.795849	1	1	1	No change	Correct	0.00805004
p134	0.586284	0.696616	1	1	1	No change	Correct	0.110332
p135	0.139468	0.112315	0	0	0	No change	Correct	-0.0271531
p136	0.3883	0.388691	0	0	1	No change	Incorrect	0.000390374
p137	0.159883	0.228216	0	0	0	No change	Correct	0.0683321
p138	0.170879	0.585177	0	1	1	Up	Correct	0.414298
p139	0.20776	0.0575495	0	0	0	No change	Correct	-0.15021
p140	0.67908	0.836053	1	1	1	No change	Correct	0.156973
p141	0.170967	0.729734	0	1	0	Up	Incorrect	0.558767
p142	0.787799	0.795849	1	1	1	No change	Correct	0.00805004
p143	0.170967	0.00862937	0	0	0	No change	Correct	-0.162338
p144	0.139468	0.0065525	0	0	0	No change	Correct	-0.132916
p145	0.139468	0.0601268	0	0	0	No change	Correct	-0.0793416
p146	0.1598	0.15496	0	0	0	No change	Correct	-0.00483987
p147	0.315113	0.33648	0	0	0	No change	Correct	0.0213673

## Sheet: D
(D) Reclassification results (S-G vs. S)
Participant ID	S_Probability	S_G_Probability	S_Class	S_G_Class	True_Label	Reclassification	Correctness	Probability_Change
p001	0.679216	0.869281	1	1	1	No change	Correct	0.190065
p002	0.696324	0.637521	1	1	1	No change	Correct	-0.0588032
p003	0.235436	0.087208	0	0	0	No change	Correct	-0.148228
p004	0.407538	0.756761	0	1	1	Up	Correct	0.349224
p005	0.67908	0.808032	1	1	1	No change	Correct	0.128952
p006	0.526743	0.356991	1	0	0	Down	Correct	-0.169752
p007	0.3883	0.424727	0	0	0	No change	Correct	0.0364267
p008	0.235436	0.0850725	0	0	0	No change	Correct	-0.150364
p009	0.60547	0.807021	1	1	1	No change	Correct	0.201551
p010	0.350901	0.495933	0	0	1	No change	Incorrect	0.145032
p011	0.661332	0.381303	1	0	0	Down	Correct	-0.280029
p012	0.170967	0.0943224	0	0	0	No change	Correct	-0.076645
p013	0.679216	0.388384	1	0	0	Down	Correct	-0.290832
p014	0.661332	0.612224	1	1	1	No change	Correct	-0.0491084
p015	0.713034	0.401679	1	0	0	Down	Correct	-0.311355
p016	0.546709	0.370138	1	0	0	Down	Correct	-0.176571
p017	0.506691	0.370311	1	0	0	Down	Correct	-0.136381
p018	0.713034	0.840798	1	1	0	No change	Incorrect	0.127764
p019	0.713034	0.583287	1	1	1	No change	Correct	-0.129747
p020	0.250198	0.0431394	0	0	0	No change	Correct	-0.207058
p021	0.75971	0.849694	1	1	1	No change	Correct	0.0899837
p022	0.250315	0.054106	0	0	1	No change	Incorrect	-0.196209
p023	0.75971	0.916533	1	1	1	No change	Correct	0.156823
p024	0.332697	0.658718	0	1	1	Up	Correct	0.326022
p025	0.298044	0.638107	0	1	0	Up	Incorrect	0.340064
p026	0.446664	0.587111	0	1	1	Up	Correct	0.140448
p027	0.369259	0.24299	0	0	0	No change	Correct	-0.126269
p028	0.194949	0.284355	0	0	1	No change	Incorrect	0.0894061
p029	0.407387	0.382409	0	0	0	No change	Correct	-0.0249779
p030	0.75971	0.916533	1	1	1	No change	Correct	0.156823
p031	0.696456	0.838653	1	1	1	No change	Correct	0.142197
p032	0.643119	0.35974	1	0	0	Down	Correct	-0.283379
p033	0.643119	0.851806	1	1	1	No change	Correct	0.208687
p034	0.566679	0.286756	1	0	0	Down	Correct	-0.279923
p035	0.506691	0.336056	1	0	0	Down	Correct	-0.170635
p036	0.369259	0.24299	0	0	0	No change	Correct	-0.126269
p037	0.566526	0.78965	1	1	1	No change	Correct	0.223123
p038	0.696324	0.712541	1	1	1	No change	Correct	0.0162165
p039	0.75971	0.874527	1	1	1	No change	Correct	0.114817
p040	0.446818	0.46386	0	0	1	No change	Incorrect	0.0170421
p041	0.744745	0.671085	1	1	1	No change	Correct	-0.0736599
p042	0.20776	0.135675	0	0	0	No change	Correct	-0.0720848
p043	0.661332	0.800074	1	1	1	No change	Correct	0.138742
p044	0.388152	0.518646	0	1	0	Up	Incorrect	0.130494
p045	0.546709	0.541895	1	1	0	No change	Incorrect	-0.00481442
p046	0.696324	0.349807	1	0	1	Down	Incorrect	-0.346517
p047	0.624483	0.224113	1	0	0	Down	Correct	-0.40037
p048	0.81341	0.962244	1	1	1	No change	Correct	0.148833
p049	0.744745	0.72627	1	1	0	No change	Incorrect	-0.0184755
p050	0.67908	0.727648	1	1	1	No change	Correct	0.0485679
p051	0.67908	0.520121	1	1	1	No change	Correct	-0.158959
p052	0.661332	0.797257	1	1	1	No change	Correct	0.135924
p053	0.526743	0.894871	1	1	1	No change	Correct	0.368128
p054	0.446818	0.136581	0	0	0	No change	Correct	-0.310237
p055	0.643119	0.491598	1	0	1	Down	Incorrect	-0.151521
p056	0.713034	0.840798	1	1	1	No change	Correct	0.127764
p057	0.526899	0.643126	1	1	0	No change	Incorrect	0.116227
p058	0.466587	0.562825	0	1	0	Up	Incorrect	0.0962382
p059	0.369259	0.252048	0	0	0	No change	Correct	-0.117211
p060	0.787799	0.893456	1	1	1	No change	Correct	0.105657
p061	0.298044	0.40426	0	0	0	No change	Correct	0.106216
p062	0.388152	0.523019	0	1	0	Up	Incorrect	0.134867
p063	0.546864	0.611689	1	1	0	No change	Incorrect	0.0648252
p064	0.643119	0.694705	1	1	1	No change	Correct	0.0515861
p065	0.369259	0.0734367	0	0	0	No change	Correct	-0.295823
p066	0.407387	0.793404	0	1	1	Up	Correct	0.386017
p067	0.67908	0.320634	1	0	0	Down	Correct	-0.358445
p068	0.696324	0.276273	1	0	0	Down	Correct	-0.420051
p069	0.466587	0.515186	0	1	0	Up	Incorrect	0.0485992
p070	0.332697	0.566915	0	1	1	Up	Correct	0.234218
p071	0.624629	0.842922	1	1	1	No change	Correct	0.218293
p072	0.713034	0.29514	1	0	0	Down	Correct	-0.417894
p073	0.281519	0.0707912	0	0	0	No change	Correct	-0.210728
p074	0.182653	0.0847572	0	0	0	No change	Correct	-0.0978955
p075	0.369259	0.495536	0	0	1	No change	Incorrect	0.126277
p076	0.643119	0.328317	1	0	0	Down	Correct	-0.314802
p077	0.170967	0.0241459	0	0	0	No change	Correct	-0.146822
p078	0.729181	0.852789	1	1	1	No change	Correct	0.123608
p079	0.566526	0.27904	1	0	1	Down	Incorrect	-0.287487
p080	0.170967	0.244911	0	0	0	No change	Correct	0.0739434
p081	0.566526	0.798822	1	1	0	No change	Incorrect	0.232296
p082	0.729304	0.796684	1	1	1	No change	Correct	0.0673797
p083	0.332697	0.0852111	0	0	0	No change	Correct	-0.247486
p084	0.506691	0.458345	1	0	1	Down	Incorrect	-0.048346
p085	0.149309	0.0592006	0	0	0	No change	Correct	-0.0901088
p086	0.67908	0.814456	1	1	1	No change	Correct	0.135377
p087	0.566526	0.864247	1	1	0	No change	Incorrect	0.297721
p088	0.315113	0.114055	0	0	0	No change	Correct	-0.201059
p089	0.526899	0.186321	1	0	0	Down	Correct	-0.340578
p090	0.713161	0.755601	1	1	1	No change	Correct	0.0424396
p091	0.466587	0.467825	0	0	1	No change	Incorrect	0.00123826
p092	0.624483	0.768847	1	1	0	No change	Incorrect	0.144364
p093	0.696324	0.825517	1	1	1	No change	Correct	0.129193
p094	0.1598	0.506851	0	1	0	Up	Incorrect	0.347051
p095	0.315113	0.431005	0	0	1	No change	Incorrect	0.115892
p096	0.75971	0.809146	1	1	0	No change	Incorrect	0.049436
p097	0.159883	0.0726748	0	0	0	No change	Correct	-0.0872087
p098	0.847257	0.954499	1	1	1	No change	Correct	0.107242
p099	0.643119	0.825917	1	1	1	No change	Correct	0.182798
p100	0.75971	0.51144	1	1	0	No change	Incorrect	-0.24827
p101	0.3883	0.542069	0	1	1	Up	Correct	0.153769
p102	0.407387	0.322563	0	0	1	No change	Incorrect	-0.0848236
p103	0.696456	0.646265	1	1	0	No change	Incorrect	-0.0501914
p104	0.713034	0.583287	1	1	1	No change	Correct	-0.129747
p105	0.526743	0.767456	1	1	1	No change	Correct	0.240713
p106	0.315113	0.426713	0	0	1	No change	Incorrect	0.1116
p107	0.729181	0.905779	1	1	1	No change	Correct	0.176597
p108	0.194949	0.200892	0	0	1	No change	Incorrect	0.00594341
p109	0.42691	0.298389	0	0	0	No change	Correct	-0.128522
p110	0.369259	0.209453	0	0	0	No change	Correct	-0.159807
p111	0.67908	0.420495	1	0	0	Down	Correct	-0.258584
p112	0.369405	0.453643	0	0	0	No change	Correct	0.0842379
p113	0.407387	0.546022	0	1	1	Up	Correct	0.138635
p114	0.566526	0.864247	1	1	1	No change	Correct	0.297721
p115	0.42691	0.100581	0	0	0	No change	Correct	-0.326329
p116	0.67908	0.873668	1	1	1	No change	Correct	0.194588
p117	0.586133	0.153198	1	0	1	Down	Incorrect	-0.432934
p118	0.369405	0.0532607	0	0	0	No change	Correct	-0.316144
p119	0.350759	0.24201	0	0	0	No change	Correct	-0.108749
p120	0.729181	0.74889	1	1	1	No change	Correct	0.0197088
p121	0.466587	0.714346	0	1	1	Up	Correct	0.247759
p122	0.332697	0.0224828	0	0	1	No change	Incorrect	-0.310214
p123	0.407387	0.37828	0	0	0	No change	Correct	-0.0291074
p124	0.281519	0.292035	0	0	1	No change	Incorrect	0.0105163
p125	0.506691	0.656329	1	1	0	No change	Incorrect	0.149638
p126	0.696456	0.579408	1	1	0	No change	Incorrect	-0.117048
p127	0.506691	0.607683	1	1	1	No change	Correct	0.100991
p128	0.661332	0.565815	1	1	1	No change	Correct	-0.0955171
p129	0.759824	0.937033	1	1	1	No change	Correct	0.17721
p130	0.696324	0.763224	1	1	1	No change	Correct	0.0668997
p131	0.566526	0.671505	1	1	0	No change	Incorrect	0.104979
p132	0.566526	0.864247	1	1	1	No change	Correct	0.297721
p133	0.787799	0.795849	1	1	1	No change	Correct	0.00805004
p134	0.586284	0.696616	1	1	1	No change	Correct	0.110332
p135	0.139468	0.112315	0	0	0	No change	Correct	-0.0271531
p136	0.3883	0.388691	0	0	1	No change	Incorrect	0.000390374
p137	0.159883	0.228216	0	0	0	No change	Correct	0.0683321
p138	0.170879	0.585177	0	1	1	Up	Correct	0.414298
p139	0.20776	0.0575495	0	0	0	No change	Correct	-0.15021
p140	0.67908	0.836053	1	1	1	No change	Correct	0.156973
p141	0.170967	0.729734	0	1	0	Up	Incorrect	0.558767
p142	0.787799	0.795849	1	1	1	No change	Correct	0.00805004
p143	0.170967	0.00862937	0	0	0	No change	Correct	-0.162338
p144	0.139468	0.0065525	0	0	0	No change	Correct	-0.132916
p145	0.139468	0.0601268	0	0	0	No change	Correct	-0.0793416
p146	0.1598	0.15496	0	0	0	No change	Correct	-0.00483987
p147	0.315113	0.33648	0	0	0	No change	Correct	0.0213673
